# Supplementary material for: Genome Analysis of Two Pseudonocardia Phylotypes Associated with Acromyrmex Leafcutter Ants Reveals Their Biosynthetic Potential
Source: PubMed Central journal article supplement (PMC5183585; doi:10.3389/fmicb.2016.02073), 2016-12-26
Supplement: Data_Sheet_1.pdf [file Data_Sheet_1.pdf]

# Genome analysis of two *Pseudonocardia* phylotypes associated with *Acromyrmex* leafcutter ants reveals their biosynthetic potential

Neil A. Holmes<sup>1</sup>, Tabitha M. Innocent<sup>2</sup>, Daniel Heine<sup>3</sup>, Mahmoud Al Bassam<sup>1</sup>, Sarah F. Worsley<sup>1</sup>, Felix Trottmann<sup>3</sup>, Elaine H. Patrick<sup>1</sup>, Douglas W. Yu<sup>1,4</sup>, J. Colin Murrell<sup>5</sup>, Morten Schiøtt<sup>2</sup>, Barrie Wilkinson<sup>3</sup>, Jacobus J. Boomsma<sup>2</sup>, Matthew I Hutchings<sup>1</sup>

<sup>1</sup>School of Biological Sciences, University of East Anglia, Norwich Research Park, Norwich, Norfolk, United Kingdom.

<sup>2</sup>Centre for Social Evolution, University of Copenhagen, Copenhagen, Denmark.

<sup>3</sup>Department of Molecular Microbiology, John Innes Centre, Norwich Research Park, Norwich, Norfolk, United Kingdom.

<sup>4</sup>State Key Laboratory of Genetic Resources and Evolution, Kunming Institute of Zoology, Kunming, Yunnan, China.

<sup>5</sup>School of Environmental Sciences, University of East Anglia, Norwich Research Park, Norwich, Norfolk, United Kingdom.

## Supplementary Information

**Supplementary Table 1. Summary of draft genome sequences.**

| Sequencing Project  | No. Unitigs | Largest Unitigs (bps) | Smallest Unitigs (bps) | No. of Preliminary Clusters (Antismash) |
|---------------------|-------------|-----------------------|------------------------|-----------------------------------------|
| Ae150A_Ps1 Illumina | 8           | 6135547               | 2072                   | 15                                      |
| Ae168_Ps1 Illumina  | 14          | 5473146               | 2073                   | 15                                      |
| Ae263_Ps1 Illumina  | 14          | 6157670               | 2073                   | 15                                      |
| Ae356_Ps1 Illumina  | 14          | 6162815               | 2206                   | 15                                      |
| Ae707_Ps1 PacBio    | 4           | 6361983               | 2594                   | 14                                      |
| Ae331_Ps2 Illumina  | 23          | 6075932               | 2005                   | 11                                      |
| Ae406_Ps2 Illumina  | 27          | 6080519               | 2001                   | 11                                      |
| Ae505_Ps2 Illumina  | 13          | 6031156               | 2260                   | 13                                      |
| Ae706_Ps2 Illumina  | 21          | 6111893               | 2111                   | 11                                      |
| Ae717_Ps2 PacBio    | 26          | 6288042               | 5131                   | 15                                      |

Assembled genomes were submitted to antismash for secondary metabolite cluster prediction, outputs displayed below (Weber *et al.*, (2015).

Overview 1 2 3 4 5 6 7 8 9 10 11 12 13 14 15

**Identified secondary metabolite clusters**

| Cluster                                                | Type            | From    | To      | Most similar known cluster                                                                    |
|--------------------------------------------------------|-----------------|---------|---------|-----------------------------------------------------------------------------------------------|
| The following clusters are from record c00001_MH_Ae15: |                 |         |         |                                                                                               |
| Cluster 1                                              | T1pks           | 25302   | 96128   | Nystatin-like_Pseudonocardia_polyene_biosynthetic_gene_cluster (73% of genes show similarity) |
| Cluster 2                                              | Bacteriocin     | 279830  | 310643  | Endophenazines_biosynthetic_gene_cluster (13% of genes show similarity)                       |
| Cluster 3                                              | T1pks           | 691938  | 784056  | Pimaricin_biosynthetic_gene_cluster (47% of genes show similarity)                            |
| Cluster 4                                              | Terpene         | 949311  | 970576  | SF2575_biosynthetic_gene_cluster (4% of genes show similarity)                                |
| Cluster 5                                              | Nrps            | 1174990 | 1247881 | Erythrochelin_biosynthetic_gene_cluster (71% of genes show similarity)                        |
| Cluster 6                                              | Bacteriocin     | 2487311 | 2498171 | -                                                                                             |
| Cluster 7                                              | Other           | 2867409 | 2914879 | Stenothricin_biosynthetic_gene_cluster (13% of genes show similarity)                         |
| Cluster 8                                              | Nrps            | 2953650 | 3007679 | Mirubactin_biosynthetic_gene_cluster (42% of genes show similarity)                           |
| Cluster 9                                              | Ectoine         | 3090854 | 3101249 | Ectoine_biosynthetic_gene_cluster (75% of genes show similarity)                              |
| Cluster 10                                             | Oligosaccharide | 3667360 | 3688043 | -                                                                                             |
| Cluster 11                                             | Other           | 3836118 | 3876684 | Thiocoraline_biosynthetic_gene_cluster (5% of genes show similarity)                          |
| Cluster 12                                             | Lantipeptide    | 4073882 | 4094031 | -                                                                                             |
| Cluster 13                                             | Other           | 5013321 | 5057700 | Kinamycin_biosynthetic_gene_cluster (8% of genes show similarity)                             |
| Cluster 14                                             | Nrps            | 5353829 | 5407642 | Gobichelin_biosynthetic_gene_cluster (16% of genes show similarity)                           |
| Cluster 15                                             | Terpene         | 5720239 | 5741237 | Sioxanthin_biosynthetic_gene_cluster (60% of genes show similarity)                           |

**Supplementary Figure 1. Screen shot of the antismash output for *Pseudonocardia* Ae150A\_Ps1.**

Select Gene Cluster:  
Overview 1 2 3 4 5 6 7 8 9 10 11 12 13 14 15

**Identified secondary metabolite clusters**

| Cluster                                                | Type            | From    | To      | Most similar known cluster                                                                    |
|--------------------------------------------------------|-----------------|---------|---------|-----------------------------------------------------------------------------------------------|
| The following clusters are from record c00001_MH_Ae16: |                 |         |         |                                                                                               |
| Cluster 1                                              | T1pks           | 29495   | 100321  | Nystatin-like_Pseudonocardia_polyene_biosynthetic_gene_cluster (73% of genes show similarity) |
| Cluster 2                                              | Bacteriocin     | 279174  | 309885  | Endophenazines_biosynthetic_gene_cluster (13% of genes show similarity)                       |
| Cluster 3                                              | T1pks           | 691404  | 783522  | Pimaricin_biosynthetic_gene_cluster (47% of genes show similarity)                            |
| Cluster 4                                              | Terpene         | 948624  | 969889  | SF2575_biosynthetic_gene_cluster (4% of genes show similarity)                                |
| Cluster 5                                              | Nrps            | 1174392 | 1247283 | Erythrochelin_biosynthetic_gene_cluster (71% of genes show similarity)                        |
| Cluster 6                                              | Bacteriocin     | 2485921 | 2496781 | -                                                                                             |
| Cluster 7                                              | Other           | 2866434 | 2913904 | Stenothricin_biosynthetic_gene_cluster (13% of genes show similarity)                         |
| Cluster 8                                              | Nrps            | 2952675 | 3006704 | Mirubactin_biosynthetic_gene_cluster (42% of genes show similarity)                           |
| Cluster 9                                              | Ectoine         | 3089879 | 3100274 | Ectoine_biosynthetic_gene_cluster (75% of genes show similarity)                              |
| Cluster 10                                             | Oligosaccharide | 3670406 | 3691089 | -                                                                                             |
| Cluster 11                                             | Other           | 3839161 | 3879727 | Thiocoraline_biosynthetic_gene_cluster (5% of genes show similarity)                          |
| Cluster 12                                             | Lantipeptide    | 4076947 | 4097096 | Kanamycin_biosynthetic_gene_cluster (1% of genes show similarity)                             |
| Cluster 13                                             | Other           | 5026769 | 5071148 | Kinamycin_biosynthetic_gene_cluster (8% of genes show similarity)                             |
| Cluster 14                                             | Nrps            | 5367141 | 5420954 | Gobichelin_biosynthetic_gene_cluster (16% of genes show similarity)                           |
| The following clusters are from record c00002_MH_Ae16: |                 |         |         |                                                                                               |
| Cluster 15                                             | Terpene         | 394356  | 415354  | Sioxanthin_biosynthetic_gene_cluster (60% of genes show similarity)                           |

**Supplementary Figure 2. Screen shot of the antismash output for *Pseudonocardia* Ae168\_Ps1.**

Overview **1** 2 3 4 5 6 7 8 9 10 11 12 13 14 15

**Identified secondary metabolite clusters**

| Cluster                                                | Type            | From    | To      | Most similar known cluster                                                                    |
|--------------------------------------------------------|-----------------|---------|---------|-----------------------------------------------------------------------------------------------|
| The following clusters are from record c00001_MH_Ae26: |                 |         |         |                                                                                               |
| Cluster 1                                              | Nrps            | 50728   | 104541  | Gobichelin_biosynthetic_gene_cluster (22% of genes show similarity)                           |
| Cluster 2                                              | Other           | 400667  | 445046  | Kinamycin_biosynthetic_gene_cluster (8% of genes show similarity)                             |
| Cluster 3                                              | Lantipeptide    | 1374731 | 1394880 | -                                                                                             |
| Cluster 4                                              | Other           | 1592018 | 1632584 | Thiocoraline_biosynthetic_gene_cluster (5% of genes show similarity)                          |
| Cluster 5                                              | Oligosaccharide | 1780683 | 1801366 | -                                                                                             |
| Cluster 6                                              | Ectoine         | 2367786 | 2378181 | Ectoine_biosynthetic_gene_cluster (75% of genes show similarity)                              |
| Cluster 7                                              | Nrps            | 2465085 | 2519122 | Mirubactin_biosynthetic_gene_cluster (42% of genes show similarity)                           |
| Cluster 8                                              | Other           | 2557893 | 2605363 | Stenothricin_biosynthetic_gene_cluster (13% of genes show similarity)                         |
| Cluster 9                                              | Bacteriocin     | 2974454 | 2985314 | -                                                                                             |
| Cluster 10                                             | Nrps            | 4231090 | 4284904 | Erythrochelin_biosynthetic_gene_cluster (71% of genes show similarity)                        |
| Cluster 11                                             | Terpene         | 4508474 | 4529739 | SF2575_biosynthetic_gene_cluster (6% of genes show similarity)                                |
| Cluster 12                                             | T1pks           | 4694995 | 4783183 | Nystatin-like_Pseudonocardia_polyene_biosynthetic_gene_cluster (43% of genes show similarity) |
| Cluster 13                                             | Bacteriocin     | 5155393 | 5201206 | Endophenazines_biosynthetic_gene_cluster (13% of genes show similarity)                       |
| Cluster 14                                             | T1pks           | 5380061 | 5450887 | Nystatin-like_Pseudonocardia_polyene_biosynthetic_gene_cluster (73% of genes show similarity) |
| Cluster 15                                             | Terpene         | 5882622 | 5903620 | Sioxanthin_biosynthetic_gene_cluster (60% of genes show similarity)                           |

**Supplementary Figure 3. Screen shot of the antismash output for *Pseudonocardia* Ae263\_Ps1.**

Select Gene Cluster:  
Overview **1** 2 3 4 5 6 7 8 9 10 11 12 13 14 15

**Identified secondary metabolite clusters**

| Cluster                                                | Type            | From    | To      | Most similar known cluster                                                                    |
|--------------------------------------------------------|-----------------|---------|---------|-----------------------------------------------------------------------------------------------|
| The following clusters are from record c00001_MH_Ae16: |                 |         |         |                                                                                               |
| Cluster 1                                              | T1pks           | 29495   | 100321  | Nystatin-like_Pseudonocardia_polyene_biosynthetic_gene_cluster (73% of genes show similarity) |
| Cluster 2                                              | Bacteriocin     | 279174  | 309885  | Endophenazines_biosynthetic_gene_cluster (13% of genes show similarity)                       |
| Cluster 3                                              | T1pks           | 691404  | 783522  | Pimaricin_biosynthetic_gene_cluster (47% of genes show similarity)                            |
| Cluster 4                                              | Terpene         | 948624  | 969889  | SF2575_biosynthetic_gene_cluster (4% of genes show similarity)                                |
| Cluster 5                                              | Nrps            | 1174392 | 1247283 | Erythrochelin_biosynthetic_gene_cluster (71% of genes show similarity)                        |
| Cluster 6                                              | Bacteriocin     | 2485921 | 2496781 | -                                                                                             |
| Cluster 7                                              | Other           | 2866434 | 2913904 | Stenothricin_biosynthetic_gene_cluster (13% of genes show similarity)                         |
| Cluster 8                                              | Nrps            | 2952675 | 3006704 | Mirubactin_biosynthetic_gene_cluster (42% of genes show similarity)                           |
| Cluster 9                                              | Ectoine         | 3089879 | 3100274 | Ectoine_biosynthetic_gene_cluster (75% of genes show similarity)                              |
| Cluster 10                                             | Oligosaccharide | 3670406 | 3691089 | -                                                                                             |
| Cluster 11                                             | Other           | 3839161 | 3879727 | Thiocoraline_biosynthetic_gene_cluster (5% of genes show similarity)                          |
| Cluster 12                                             | Lantipeptide    | 4076947 | 4097096 | Kanamycin_biosynthetic_gene_cluster (1% of genes show similarity)                             |
| Cluster 13                                             | Other           | 5026769 | 5071148 | Kinamycin_biosynthetic_gene_cluster (8% of genes show similarity)                             |
| Cluster 14                                             | Nrps            | 5367141 | 5420954 | Gobichelin_biosynthetic_gene_cluster (16% of genes show similarity)                           |
| The following clusters are from record c00002_MH_Ae16: |                 |         |         |                                                                                               |
| Cluster 15                                             | Terpene         | 394356  | 415354  | Sioxanthin_biosynthetic_gene_cluster (60% of genes show similarity)                           |

**Supplementary Figure 4. Screen shot of the antismash output for *Pseudonocardia* Ae356\_Ps1.**

Select Gene Cluster:  
Overview 1 2 3 4 5 6 7 8 9 10 11 12 13 14

**Identified secondary metabolite clusters**

| Cluster                                                | Type            | From    | To      | Most similar known cluster                                                                    |
|--------------------------------------------------------|-----------------|---------|---------|-----------------------------------------------------------------------------------------------|
| The following clusters are from record unitig_0quiver: |                 |         |         |                                                                                               |
| Cluster 1                                              | Oligosaccharide | 56032   | 85438   | -                                                                                             |
| Cluster 2                                              | Oligosaccharide | 188517  | 240149  | Tomaymycin_biosynthetic_gene_cluster (11% of genes show similarity)                           |
| Cluster 3                                              | Other           | 414511  | 455164  | Thiocoraline_biosynthetic_gene_cluster (5% of genes show similarity)                          |
| Cluster 4                                              | Nrps            | 1719125 | 1776380 | Gobichelin_biosynthetic_gene_cluster (16% of genes show similarity)                           |
| Cluster 5                                              | Terpene         | 2177040 | 2198059 | Sioxanthin_biosynthetic_gene_cluster (60% of genes show similarity)                           |
| Cluster 6                                              | Bacteriocin     | 2911608 | 2942494 | Endophenazines_biosynthetic_gene_cluster (13% of genes show similarity)                       |
| Cluster 7                                              | T1pks           | 3345783 | 3488407 | Nystatin-like_Pseudonocardia_polyene_biosynthetic_gene_cluster (95% of genes show similarity) |
| Cluster 8                                              | Terpene         | 3638728 | 3659975 | SF2575_biosynthetic_gene_cluster (4% of genes show similarity)                                |
| Cluster 9                                              | Nrps            | 3866837 | 3939727 | Erythrochelin_biosynthetic_gene_cluster (71% of genes show similarity)                        |
| Cluster 10                                             | Other           | 4710606 | 4754841 | -                                                                                             |
| Cluster 11                                             | Bacteriocin     | 5327392 | 5338333 | -                                                                                             |
| Cluster 12                                             | Other           | 5676793 | 5724917 | Stenothricin_biosynthetic_gene_cluster (13% of genes show similarity)                         |
| Cluster 13                                             | Nrps            | 5753305 | 5806262 | Mirubactin_biosynthetic_gene_cluster (50% of genes show similarity)                           |
| Cluster 14                                             | Ectoine         | 5865458 | 5875904 | Ectoine_biosynthetic_gene_cluster (75% of genes show similarity)                              |

**Supplementary Figure 5. Screen shot of the antismash output for *Pseudonocardia* Ae707\_Ps1.**

Select Gene Cluster:  
Overview 1 2 3 4 5 6 7 8 9 10 11

**Identified secondary metabolite clusters**

| Cluster                                                | Type            | From    | To      | Most similar known cluster                                                                    |
|--------------------------------------------------------|-----------------|---------|---------|-----------------------------------------------------------------------------------------------|
| The following clusters are from record c00001_MH_Ae33: |                 |         |         |                                                                                               |
| Cluster 1                                              | Terpene         | 781011  | 802687  | Brasilicardin_A_biosynthetic_gene_cluster (45% of genes show similarity)                      |
| Cluster 2                                              | Bacteriocin     | 1174490 | 1185383 | -                                                                                             |
| Cluster 3                                              | Ectoine         | 1666066 | 1676461 | Ectoine_biosynthetic_gene_cluster (75% of genes show similarity)                              |
| Cluster 4                                              | Oligosaccharide | 2231888 | 2252565 | -                                                                                             |
| Cluster 5                                              | Bacteriocin     | 3612149 | 3622970 | -                                                                                             |
| Cluster 6                                              | Terpene         | 4081263 | 4102255 | Carotenoid_biosynthetic_gene_cluster (27% of genes show similarity)                           |
| Cluster 7                                              | T1pks           | 4380747 | 4519777 | Nystatin-like_Pseudonocardia_polyene_biosynthetic_gene_cluster (73% of genes show similarity) |
| Cluster 8                                              | Nrps-T1pks      | 4721587 | 4863642 | Amychelin_biosynthetic_gene_cluster (31% of genes show similarity)                            |
| Cluster 9                                              | Terpene         | 5326209 | 5347564 | SF2575_biosynthetic_gene_cluster (4% of genes show similarity)                                |
| Cluster 10                                             | Other           | 6006054 | 6070086 | UK-68,597_biosynthetic_gene_cluster (4% of genes show similarity)                             |
| The following clusters are from record c00002_MH_Ae33: |                 |         |         |                                                                                               |
| Cluster 11                                             | Lasso peptide   | 89260   | 111169  | -                                                                                             |

**Supplementary Figure 6. Screen shot of the antismash output for *Pseudonocardia* Ae331\_Ps2.**

Select Gene Cluster:  
Overview 1 2 3 4 5 6 7 8 9 10 11

**Identified secondary metabolite clusters**

| Cluster                                                | Type            | From    | To      | Most similar known cluster                                                                    |
|--------------------------------------------------------|-----------------|---------|---------|-----------------------------------------------------------------------------------------------|
| The following clusters are from record c00001_MH_Ae40: |                 |         |         |                                                                                               |
| Cluster 1                                              | Other           | 5853    | 69885   | UK-68,597_biosynthetic_gene_cluster (4% of genes show similarity)                             |
| Cluster 2                                              | Terpene         | 730605  | 751954  | SF2575_biosynthetic_gene_cluster (6% of genes show similarity)                                |
| Cluster 3                                              | Nrps-T1pks      | 1213868 | 1354303 | Amychelin_biosynthetic_gene_cluster (31% of genes show similarity)                            |
| Cluster 4                                              | T1pks           | 1554210 | 1688401 | Nystatin-like_Pseudonocardia_polyene_biosynthetic_gene_cluster (73% of genes show similarity) |
| Cluster 5                                              | Terpene         | 1982209 | 2003201 | Carotenoid_biosynthetic_gene_cluster (27% of genes show similarity)                           |
| Cluster 6                                              | Bacteriocin     | 2457460 | 2468281 | -                                                                                             |
| Cluster 7                                              | Oligosaccharide | 3825163 | 3845840 | -                                                                                             |
| Cluster 8                                              | Ectoine         | 4409093 | 4419488 | Ectoine_biosynthetic_gene_cluster (100% of genes show similarity)                             |
| Cluster 9                                              | Bacteriocin     | 4897074 | 4907967 | -                                                                                             |
| Cluster 10                                             | Terpene         | 5281504 | 5303180 | Brasilicardin_A_biosynthetic_gene_cluster (54% of genes show similarity)                      |
| The following clusters are from record c00002_MH_Ae40: |                 |         |         |                                                                                               |
| Cluster 11                                             | Lassoptide      | 92023   | 113932  | -                                                                                             |

**Supplementary Figure 7. Screen shot of the antismash output for *Pseudonocardia* Ae406\_Ps2.**

Select Gene Cluster:  
Overview 1 2 3 4 5 6 7 8 9 10 11 12 13

**Identified secondary metabolite clusters**

| Cluster                                                | Type            | From    | To      | Most similar known cluster                                                                    |
|--------------------------------------------------------|-----------------|---------|---------|-----------------------------------------------------------------------------------------------|
| The following clusters are from record c00001_MH_Ae50: |                 |         |         |                                                                                               |
| Cluster 1                                              | Terpene         | 153971  | 175647  | Brasilicardin_A_biosynthetic_gene_cluster (45% of genes show similarity)                      |
| Cluster 2                                              | Bacteriocin     | 545698  | 556591  | -                                                                                             |
| Cluster 3                                              | Ectoine         | 1027041 | 1037436 | Ectoine_biosynthetic_gene_cluster (75% of genes show similarity)                              |
| Cluster 4                                              | Oligosaccharide | 1605297 | 1625992 | -                                                                                             |
| Cluster 5                                              | Bacteriocin     | 3018924 | 3029745 | -                                                                                             |
| Cluster 6                                              | Terpene         | 3264901 | 3285893 | Isorenieratene_biosynthetic_gene_cluster (28% of genes show similarity)                       |
| Cluster 7                                              | Other           | 3697921 | 3761893 | UK-68,597_biosynthetic_gene_cluster (4% of genes show similarity)                             |
| Cluster 8                                              | T1pks           | 4197361 | 4258545 | Macbecin_biosynthetic_gene_cluster (39% of genes show similarity)                             |
| Cluster 9                                              | Nrps            | 4302433 | 4362588 | Kiamycin_biosynthetic_gene_cluster (10% of genes show similarity)                             |
| Cluster 10                                             | T1pks-Nrps      | 4356144 | 4461507 | Amychelin_biosynthetic_gene_cluster (31% of genes show similarity)                            |
| Cluster 11                                             | Terpene         | 4926042 | 4947361 | SF2575_biosynthetic_gene_cluster (4% of genes show similarity)                                |
| Cluster 12                                             | T1pks           | 5232700 | 5300963 | Nystatin-like_Pseudonocardia_polyene_biosynthetic_gene_cluster (47% of genes show similarity) |
| The following clusters are from record c00002_MH_Ae50: |                 |         |         |                                                                                               |
| Cluster 13                                             | Lassoptide      | 101953  | 123862  | -                                                                                             |

**Supplementary Figure 8. Screen shot of the antismash output for *Pseudonocardia* Ae505\_Ps2.**

Select Gene Cluster:  
Overview 1 2 3 4 5 6 7 8 9 10 11

**Identified secondary metabolite clusters**

| Cluster                                                | Type            | From    | To      | Most similar known cluster                                                                    |
|--------------------------------------------------------|-----------------|---------|---------|-----------------------------------------------------------------------------------------------|
| The following clusters are from record c00001_MH_Ae70: |                 |         |         |                                                                                               |
| Cluster 1                                              | Other           | 5853    | 69885   | UK-68,597_biosynthetic_gene_cluster (4% of genes show similarity)                             |
| Cluster 2                                              | Terpene         | 740562  | 761911  | SF2575_biosynthetic_gene_cluster (6% of genes show similarity)                                |
| Cluster 3                                              | Nrps-T1pks      | 1224015 | 1363220 | Amychelin_biosynthetic_gene_cluster (31% of genes show similarity)                            |
| Cluster 4                                              | T1pks           | 1563134 | 1702164 | Nystatin-like_Pseudonocardia_polyene_biosynthetic_gene_cluster (73% of genes show similarity) |
| Cluster 5                                              | Terpene         | 1992113 | 2013105 | Carotenoid_biosynthetic_gene_cluster (27% of genes show similarity)                           |
| Cluster 6                                              | Bacteriocin     | 2468953 | 2479774 | -                                                                                             |
| Cluster 7                                              | Oligosaccharide | 3835997 | 3856674 | -                                                                                             |
| Cluster 8                                              | Ectoine         | 4424378 | 4434773 | Ectoine_biosynthetic_gene_cluster (100% of genes show similarity)                             |
| Cluster 9                                              | Bacteriocin     | 4915836 | 4926729 | -                                                                                             |
| Cluster 10                                             | Terpene         | 5302849 | 5324525 | Brasilicardin_A_biosynthetic_gene_cluster (54% of genes show similarity)                      |
| The following clusters are from record c00002_MH_Ae70: |                 |         |         |                                                                                               |
| Cluster 11                                             | Lasso peptide   | 111865  | 133774  | -                                                                                             |

**Supplementary Figure 9. Screen shot of the antimash output for *Pseudonocardia* Ae706\_Ps2.**

Select Gene Cluster:  
Overview 1 2 3 4 5 6 7 8 9 10 11 12 13 14 15

**Identified secondary metabolite clusters**

| Cluster                                                 | Type            | From    | To      | Most similar known cluster                                                                    |
|---------------------------------------------------------|-----------------|---------|---------|-----------------------------------------------------------------------------------------------|
| The following clusters are from record unitig_4quiver:  |                 |         |         |                                                                                               |
| Cluster 1                                               | Otherks         | 766234  | 807433  | Galbonolides_biosynthetic_gene_cluster (16% of genes show similarity)                         |
| Cluster 2                                               | Bacteriocin     | 1131133 | 1142233 | -                                                                                             |
| Cluster 3                                               | Other           | 1654291 | 1718271 | UK-68,597_biosynthetic_gene_cluster (4% of genes show similarity)                             |
| Cluster 4                                               | T1pks           | 2222655 | 2283874 | Macbecin_biosynthetic_gene_cluster (47% of genes show similarity)                             |
| Cluster 5                                               | Nrps            | 2326835 | 2386990 | Kiamycin_biosynthetic_gene_cluster (10% of genes show similarity)                             |
| Cluster 6                                               | T1pks-Nrps      | 2387695 | 2494012 | Amychelin_biosynthetic_gene_cluster (31% of genes show similarity)                            |
| Cluster 7                                               | Terpene         | 2956317 | 2977720 | SF2575_biosynthetic_gene_cluster (4% of genes show similarity)                                |
| Cluster 8                                               | T1pks           | 3259748 | 3397832 | Nystatin-like_Pseudonocardia_polyene_biosynthetic_gene_cluster (73% of genes show similarity) |
| Cluster 9                                               | Terpene         | 3688660 | 3709652 | Isoreneratene_biosynthetic_gene_cluster (28% of genes show similarity)                        |
| Cluster 10                                              | Terpene         | 4500688 | 4522868 | Brasilicardin_A_biosynthetic_gene_cluster (45% of genes show similarity)                      |
| Cluster 11                                              | Bacteriocin     | 4901917 | 4912810 | -                                                                                             |
| Cluster 12                                              | Ectoine         | 5387849 | 5398496 | Ectoine_biosynthetic_gene_cluster (75% of genes show similarity)                              |
| Cluster 13                                              | Oligosaccharide | 5947675 | 5977172 | -                                                                                             |
| The following clusters are from record unitig_6quiver:  |                 |         |         |                                                                                               |
| Cluster 14                                              | Lasso peptide   | 60885   | 83439   | -                                                                                             |
| The following clusters are from record unitig_17quiver: |                 |         |         |                                                                                               |
| Cluster 15                                              | T2pks           | 32985   | 76304   | Arimetamycin_biosynthetic_gene_cluster (21% of genes show similarity)                         |

**Supplementary Figure 10. Screen shot of the antimash output for *Pseudonocardia* Ae717\_Ps2.**

Clustal 2.1 (Larkin *et al.*, 2007) was used to align the 16S rRNA gene, the *rpsL* gene and the *rpoB* gene from different *Pseudonocardia* strains.

*Pseudonocardia* 16S rRNA gene alignment;

```

Ae706Ps2_16S      AGAGTTTGATCCTGGCTCAGGACGAACGCTGGCGGCGTGCTTAACACATGCAAGTCGAGC
Ae717Ps2_16S      AGAGTTTGATCCTGGCTCAGGACGAACGCTGGCGGCGTGCTTAACACATGCAAGTCGAGC
Ae505Ps2_16S      AGAGTTTGATCCTGGCTCAGGACGAACGCTGGCGGCGTGCTTAACACATGCAAGTCGAGC
Ae406Ps2_16S      AGAGTTTGATCCTGGCTCAGGACGAACGCTGGCGGCGTGCTTAACACATGCAAGTCGAGC
Ae331Ps2_16S      AGAGTTTGATCCTGGCTCAGGACGAACGCTGGCGGCGTGCTTAACACATGCAAGTCGAGC
Ae150APs1_16S     AGAGTTTGATCCTGGCTCAGGACGAACGCTGGCGGCGTGCTTAACACATGCAAGTCGAGC
Ae707Ps1_16S      AGAGTTTGATCCTGGCTCAGGACGAACGCTGGCGGCGTGCTTAACACATGCAAGTCGAGC
Ae168Ps1_16S      AGAGTTTGATCCTGGCTCAGGACGAACGCTGGCGGCGTGCTTAACACATGCAAGTCGAGC

```

Ae263Ps1\_16S AGAGTTTGATCCTGGCTCAGGACGAACGCTGGCGGCGTGCTTAACACATGCAAGTCGAGC  
Ae356Ps1\_16S AGAGTTTGATCCTGGCTCAGGACGAACGCTGGCGGCGTGCTTAACACATGCAAGTCGAGC  
\*\*\*\*\*

Ae706Ps2\_16S GGTAAGGCCCTTTCGGGGGTACACGAGCGGCGAACGGGTGAGTAACACGTGGGTGACCTG  
Ae717Ps2\_16S GGTAAGGCCCTTTCGGGGGTACACGAGCGGCGAACGGGTGAGTAACACGTGGGTGACCTG  
Ae505Ps2\_16S GGTAAGGCCCTTTCGGGGGTACACGAGCGGCGAACGGGTGAGTAACACGTGGGTGACCTG  
Ae406Ps2\_16S GGTAAGGCCCTTTCGGGGGTACACGAGCGGCGAACGGGTGAGTAACACGTGGGTGACCTG  
Ae331Ps2\_16S GGTAAGGCCCTTTCGGGGGTACACGAGCGGCGAACGGGTGAGTAACACGTGGGTGACCTG  
Ae150APs1\_16S GGTAAGGCCCTTTCGGGGGTACACGAGCGGCGAACGGGTGAGTAACACGTGGGTGACCTG  
Ae707Ps1\_16S GGTAAGGCCCTTTCGGGGGTACACGAGCGGCGAACGGGTGAGTAACACGTGGGTGACCTG  
Ae168Ps1\_16S GGTAAGGCCCTTTCGGGGGTACACGAGCGGCGAACGGGTGAGTAACACGTGGGTGACCTG  
Ae263Ps1\_16S GGTAAGGCCCTTTCGGGGGTACACGAGCGGCGAACGGGTGAGTAACACGTGGGTGACCTG  
Ae356Ps1\_16S GGTAAGGCCCTTTCGGGGGTACACGAGCGGCGAACGGGTGAGTAACACGTGGGTGACCTG  
\*\*\*\*\*

Ae706Ps2\_16S CCCTCCACTCTGGGATAAGCCTGGGAACTGGGTCTAATACCGGATAGGACCACTGGCTG  
Ae717Ps2\_16S CCCTCCACTCTGGGATAAGCCTGGGAACTGGGTCTAATACCGGATAGGACCACTGGCTG  
Ae505Ps2\_16S CCCTCCACTCTGGGATAAGCCTGGGAACTGGGTCTAATACCGGATAGGACCACTGGCTG  
Ae406Ps2\_16S CCCTCCACTCTGGGATAAGCCTGGGAACTGGGTCTAATACCGGATAGGACCACTGGCTG  
Ae331Ps2\_16S CCCTCCACTCTGGGATAAGCCTGGGAACTGGGTCTAATACCGGATAGGACCACTGGCTG  
Ae150APs1\_16S CCCTCCACTCTGGGATAAGCCCGGAACTGGGTCTAATACCGGATAGGACCTCTCAACG  
Ae707Ps1\_16S CCCTCCACTCTGGGATAAGCCCGGAACTGGGTCTAATACCGGATAGGACCTCTCAACG  
Ae168Ps1\_16S CCCTCCACTCTGGGATAAGCCCGGAACTGGGTCTAATACCGGATAGGACCTCTCAACG  
Ae263Ps1\_16S CCCTCCACTCTGGGATAAGCCCGGAACTGGGTCTAATACCGGATAGGACCTCTCAACG  
Ae356Ps1\_16S CCCTCCACTCTGGGATAAGCCCGGAACTGGGTCTAATACCGGATAGGACCTCTCAACG  
\*\*\*\*\*

Ae706Ps2\_16S CATGTTGGTGGTGGAAAGTTTTTT-CGGTGGGGGATGGGCCCGCGCCTATCAGCTTGT  
Ae717Ps2\_16S CATGTTGGTGGTGGAAAGTTTTTTTCGGTGGGGGATGGGCCCGCGCCTATCAGCTTGT  
Ae505Ps2\_16S CATGTTGGTGGTGGAAAGTTTTTT-CGGTGGGGGATGGGCCCGCGCCTATCAGCTTGT  
Ae406Ps2\_16S CATGTTGGTGGTGGAAAGTTTTTT-CGGTGGGGGATGGGCCCGCGCCTATCAGCTTGT  
Ae331Ps2\_16S CATGTTGGTGGTGGAAAGTTTTTT-CGGTGGGGGATGGGCCCGCGCCTATCAGCTTGT  
Ae150APs1\_16S CATGTTGGTGGTGGAAAGTTTTTT-CGGTGGGGGATGGGCCCGCGCCTATCAGCTTGT  
Ae707Ps1\_16S CATGTTGGTGGTGGAAAGTTTTTT-CGGTGGGGGATGGGCCCGCGCCTATCAGCTTGT  
Ae168Ps1\_16S CATGTTGGTGGTGGAAAGTTTTTT-CGGTGGGGGATGGGCCCGCGCCTATCAGCTTGT  
Ae263Ps1\_16S CATGTTGGTGGTGGAAAGTTTTTT-CGGTGGGGGATGGGCCCGCGCCTATCAGCTTGT  
Ae356Ps1\_16S CATGTTGGTGGTGGAAAGTTTTTT-CGGTGGGGGATGGGCCCGCGCCTATCAGCTTGT  
\*\*\*\* \* \*\*\*\*\*

Ae706Ps2\_16S TGGTGGGGTATGGCTACCAAGGCGGTGACGGGTAGCCGGCTGAGAGGGCGACCGGCC  
Ae717Ps2\_16S TGGTGGGGTATGGCTACCAAGGCGGTGACGGGTAGCCGGCTGAGAGGGCGACCGGCC  
Ae505Ps2\_16S TGGTGGGGTATGGCTACCAAGGCGGTGACGGGTAGCCGGCTGAGAGGGCGACCGGCC  
Ae406Ps2\_16S TGGTGGGGTATGGCTACCAAGGCGGTGACGGGTAGCCGGCTGAGAGGGCGACCGGCC  
Ae331Ps2\_16S TGGTGGGGTATGGCTACCAAGGCGGTGACGGGTAGCCGGCTGAGAGGGCGACCGGCC  
Ae150APs1\_16S TGGTGGGGTATGGCTACCAAGGCGGTGACGGGTAGCCGGCTGAGAGGGCGACCGGCC  
Ae707Ps1\_16S TGGTGGGGTATGGCTACCAAGGCGGTGACGGGTAGCCGGCTGAGAGGGCGACCGGCC  
Ae168Ps1\_16S TGGTGGGGTATGGCTACCAAGGCGGTGACGGGTAGCCGGCTGAGAGGGCGACCGGCC  
Ae263Ps1\_16S TGGTGGGGTATGGCTACCAAGGCGGTGACGGGTAGCCGGCTGAGAGGGCGACCGGCC  
Ae356Ps1\_16S TGGTGGGGTATGGCTACCAAGGCGGTGACGGGTAGCCGGCTGAGAGGGCGACCGGCC  
\*\*\*\*\*

Ae706Ps2\_16S ACACTGGGACTGAGACACGGCCAGACTCCTACGGGAGGCAGCAGTGGGGAATATTGCGC  
Ae717Ps2\_16S ACACTGGGACTGAGACACGGCCAGACTCCTACGGGAGGCAGCAGTGGGGAATATTGCGC  
Ae505Ps2\_16S ACACTGGGACTGAGACACGGCCAGACTCCTACGGGAGGCAGCAGTGGGGAATATTGCGC  
Ae406Ps2\_16S ACACTGGGACTGAGACACGGCCAGACTCCTACGGGAGGCAGCAGTGGGGAATATTGCGC  
Ae331Ps2\_16S ACACTGGGACTGAGACACGGCCAGACTCCTACGGGAGGCAGCAGTGGGGAATATTGCGC  
Ae150APs1\_16S ACACTGGGACTGAGACACGGCCAGACTCCTACGGGAGGCAGCAGTGGGGAATATTGCGC  
Ae707Ps1\_16S ACACTGGGACTGAGACACGGCCAGACTCCTACGGGAGGCAGCAGTGGGGAATATTGCGC  
Ae168Ps1\_16S ACACTGGGACTGAGACACGGCCAGACTCCTACGGGAGGCAGCAGTGGGGAATATTGCGC  
Ae263Ps1\_16S ACACTGGGACTGAGACACGGCCAGACTCCTACGGGAGGCAGCAGTGGGGAATATTGCGC  
Ae356Ps1\_16S ACACTGGGACTGAGACACGGCCAGACTCCTACGGGAGGCAGCAGTGGGGAATATTGCGC  
\*\*\*\*\*

Ae706Ps2\_16S AATGGGCGGAAGCCTGACGCAGCAGCAGCCGCGTGGGGGATGACGGCCTTCGGGTTGTAAA  
Ae717Ps2\_16S AATGGGCGGAAGCCTGACGCAGCAGCAGCCGCGTGGGGGATGACGGCCTTCGGGTTGTAAA  
Ae505Ps2\_16S AATGGGCGGAAGCCTGACGCAGCAGCAGCCGCGTGGGGGATGACGGCCTTCGGGTTGTAAA  
Ae406Ps2\_16S AATGGGCGGAAGCCTGACGCAGCAGCAGCCGCGTGGGGGATGACGGCCTTCGGGTTGTAAA  
Ae331Ps2\_16S AATGGGCGGAAGCCTGACGCAGCAGCAGCCGCGTGGGGGATGACGGCCTTCGGGTTGTAAA  
Ae150APs1\_16S AATGGGCGGAAGCCTGACGCAGCAGCAGCCGCGTGGGGGATGACGGCCTTCGGGTTGTAAA  
Ae707Ps1\_16S AATGGGCGGAAGCCTGACGCAGCAGCAGCCGCGTGGGGGATGACGGCCTTCGGGTTGTAAA  
Ae168Ps1\_16S AATGGGCGGAAGCCTGACGCAGCAGCAGCCGCGTGGGGGATGACGGCCTTCGGGTTGTAAA  
Ae263Ps1\_16S AATGGGCGGAAGCCTGACGCAGCAGCAGCCGCGTGGGGGATGACGGCCTTCGGGTTGTAAA  
Ae356Ps1\_16S AATGGGCGGAAGCCTGACGCAGCAGCAGCCGCGTGGGGGATGACGGCCTTCGGGTTGTAAA  
\*\*\*\*\*

Ae706Ps2\_16S CCTCTTTCGCCAGGGACGAAGAGTGATTGACGGTACCTGGAGAAGAAGCACCGGCCAAT

Ae717Ps2\_16S CCTCTTTCGCCAGGGACGAAGAGTGATTGACGGTACCTGGAGAAGAAGCACCGGCCAACT  
Ae505Ps2\_16S CCTCTTTCGCCAGGGACGAAGAGTGATTGACGGTACCTGGAGAAGAAGCACCGGCCAACT  
Ae406Ps2\_16S CCTCTTTCGCCAGGGACGAAGAGTGATTGACGGTACCTGGAGAAGAAGCACCGGCCAACT  
Ae331Ps2\_16S CCTCTTTCGCCAGGGACGAAGAGTGATTGACGGTACCTGGAGAAGAAGCACCGGCCAACT  
Ae150APs1\_16S CCTCTTTCGCCAGGGACGAAGCTTTTGTGACGGTACCTGGAGAAGAAGCACCGGCCAACT  
Ae707Ps1\_16S CCTCTTTCGCCAGGGACGAAGCTTTTGTGACGGTACCTGGAGAAGAAGCACCGGCCAACT  
Ae168Ps1\_16S CCTCTTTCGCCAGGGACGAAGCTTTTGTGACGGTACCTGGAGAAGAAGCACCGGCCAACT  
Ae263Ps1\_16S CCTCTTTCGCCAGGGACGAAGCTTTTGTGACGGTACCTGGAGAAGAAGCACCGGCCAACT  
Ae356Ps1\_16S CCTCTTTCGCCAGGGACGAAGCTTTTGTGACGGTACCTGGAGAAGAAGCACCGGCCAACT  
\*\*\*\*\* \* \*\*\*\*\*

Ae706Ps2\_16S ACGTGCCAGCAGCCGCGGTAACACGTAGGGTGCGAGCGTTGTCCGGAATTATTGGGCGTA  
Ae717Ps2\_16S ACGTGCCAGCAGCCGCGGTAACACGTAGGGTGCGAGCGTTGTCCGGAATTATTGGGCGTA  
Ae505Ps2\_16S ACGTGCCAGCAGCCGCGGTAACACGTAGGGTGCGAGCGTTGTCCGGAATTATTGGGCGTA  
Ae406Ps2\_16S ACGTGCCAGCAGCCGCGGTAACACGTAGGGTGCGAGCGTTGTCCGGAATTATTGGGCGTA  
Ae331Ps2\_16S ACGTGCCAGCAGCCGCGGTAACACGTAGGGTGCGAGCGTTGTCCGGAATTATTGGGCGTA  
Ae150APs1\_16S ACGTGCCAGCAGCCGCGGTAACACGTAGGGTGCGAGCGTTGTCCGGAATTATTGGGCGTA  
Ae707Ps1\_16S ACGTGCCAGCAGCCGCGGTAACACGTAGGGTGCGAGCGTTGTCCGGAATTATTGGGCGTA  
Ae168Ps1\_16S ACGTGCCAGCAGCCGCGGTAACACGTAGGGTGCGAGCGTTGTCCGGAATTATTGGGCGTA  
Ae263Ps1\_16S ACGTGCCAGCAGCCGCGGTAACACGTAGGGTGCGAGCGTTGTCCGGAATTATTGGGCGTA  
Ae356Ps1\_16S ACGTGCCAGCAGCCGCGGTAACACGTAGGGTGCGAGCGTTGTCCGGAATTATTGGGCGTA  
\*\*\*\*\*

Ae706Ps2\_16S AAGAGCTCGTAGGCCGTTGTGTCGCGTCGGCCGTGAAAACCTGGGGCTTAACCTGAGCGT  
Ae717Ps2\_16S AAGAGCTCGTAGGCCGTTGTGTCGCGTCGGCCGTGAAAACCTGGGGCTTAACCTGAGCGT  
Ae505Ps2\_16S AAGAGCTCGTAGGCCGTTGTGTCGCGTCGGCCGTGAAAACCTGGGGCTTAACCTGAGCGT  
Ae406Ps2\_16S AAGAGCTCGTAGGCCGTTGTGTCGCGTCGGCCGTGAAAACCTGGGGCTTAACCTGAGCGT  
Ae331Ps2\_16S AAGAGCTCGTAGGCCGTTGTGTCGCGTCGGCCGTGAAAACCTGGGGCTTAACCTGAGCGT  
Ae150APs1\_16S AAGAGCTCGTAGGCCGTTGTGTCGCGTCGGCCGTGAAAACCTGGGGCTTAACCTGAGCGT  
Ae707Ps1\_16S AAGAGCTCGTAGGCCGTTGTGTCGCGTCGGCCGTGAAAACCTGGGGCTTAACCTGAGCGT  
Ae168Ps1\_16S AAGAGCTCGTAGGCCGTTGTGTCGCGTCGGCCGTGAAAACCTGGGGCTTAACCTGAGCGT  
Ae263Ps1\_16S AAGAGCTCGTAGGCCGTTGTGTCGCGTCGGCCGTGAAAACCTGGGGCTTAACCTGAGCGT  
Ae356Ps1\_16S AAGAGCTCGTAGGCCGTTGTGTCGCGTCGGCCGTGAAAACCTGGGGCTTAACCTGAGCGT  
\*\*\*\*\*

Ae706Ps2\_16S GCGGTCGATACGGGCATCACTTGAGTTCGGCAGGGGAGACTGGAATTCCTGGTGTAGCGG  
Ae717Ps2\_16S GCGGTCGATACGGGCATCACTTGAGTTCGGCAGGGGAGACTGGAATTCCTGGTGTAGCGG  
Ae505Ps2\_16S GCGGTCGATACGGGCATCACTTGAGTTCGGCAGGGGAGACTGGAATTCCTGGTGTAGCGG  
Ae406Ps2\_16S GCGGTCGATACGGGCATCACTTGAGTTCGGCAGGGGAGACTGGAATTCCTGGTGTAGCGG  
Ae331Ps2\_16S GCGGTCGATACGGGCATCACTTGAGTTCGGCAGGGGAGACTGGAATTCCTGGTGTAGCGG  
Ae150APs1\_16S GCGGTCGATACGGGCATCACTTGAGTTCGGCAGGGGAGACTGGAATTCCTGGTGTAGCGG  
Ae707Ps1\_16S GCGGTCGATACGGGCATCACTTGAGTTCGGCAGGGGAGACTGGAATTCCTGGTGTAGCGG  
Ae168Ps1\_16S GCGGTCGATACGGGCATCACTTGAGTTCGGCAGGGGAGACTGGAATTCCTGGTGTAGCGG  
Ae263Ps1\_16S GCGGTCGATACGGGCATCACTTGAGTTCGGCAGGGGAGACTGGAATTCCTGGTGTAGCGG  
Ae356Ps1\_16S GCGGTCGATACGGGCATCACTTGAGTTCGGCAGGGGAGACTGGAATTCCTGGTGTAGCGG  
\*\*\*\*\*

Ae706Ps2\_16S TGAAATGCCGAGATATCAGGAGGAACACCGGTGGCGAAGGCGGGTCTCTGGGCCGATACT  
Ae717Ps2\_16S TGAAATGCCGAGATATCAGGAGGAACACCGGTGGCGAAGGCGGGTCTCTGGGCCGATACT  
Ae505Ps2\_16S TGAAATGCCGAGATATCAGGAGGAACACCGGTGGCGAAGGCGGGTCTCTGGGCCGATACT  
Ae406Ps2\_16S TGAAATGCCGAGATATCAGGAGGAACACCGGTGGCGAAGGCGGGTCTCTGGGCCGATACT  
Ae331Ps2\_16S TGAAATGCCGAGATATCAGGAGGAACACCGGTGGCGAAGGCGGGTCTCTGGGCCGATACT  
Ae150APs1\_16S TGAAATGCCGAGATATCAGGAGGAACACCGGTGGCGAAGGCGGGTCTCTGGGCCGATACT  
Ae707Ps1\_16S TGAAATGCCGAGATATCAGGAGGAACACCGGTGGCGAAGGCGGGTCTCTGGGCCGATACT  
Ae168Ps1\_16S TGAAATGCCGAGATATCAGGAGGAACACCGGTGGCGAAGGCGGGTCTCTGGGCCGATACT  
Ae263Ps1\_16S TGAAATGCCGAGATATCAGGAGGAACACCGGTGGCGAAGGCGGGTCTCTGGGCCGATACT  
Ae356Ps1\_16S TGAAATGCCGAGATATCAGGAGGAACACCGGTGGCGAAGGCGGGTCTCTGGGCCGATACT  
\*\*\*\*\*

Ae706Ps2\_16S GACGCTGAGGAGCGAAAGCGTGGGGAGCGAACAGGATTAGATACCCCTGGTAGTCCACGCC  
Ae717Ps2\_16S GACGCTGAGGAGCGAAAGCGTGGGGAGCGAACAGGATTAGATACCCCTGGTAGTCCACGCC  
Ae505Ps2\_16S GACGCTGAGGAGCGAAAGCGTGGGGAGCGAACAGGATTAGATACCCCTGGTAGTCCACGCC  
Ae406Ps2\_16S GACGCTGAGGAGCGAAAGCGTGGGGAGCGAACAGGATTAGATACCCCTGGTAGTCCACGCC  
Ae331Ps2\_16S GACGCTGAGGAGCGAAAGCGTGGGGAGCGAACAGGATTAGATACCCCTGGTAGTCCACGCC  
Ae150APs1\_16S GACGCTGAGGAGCGAAAGCGTGGGGAGCGAACAGGATTAGATACCCCTGGTAGTCCACGCC  
Ae707Ps1\_16S GACGCTGAGGAGCGAAAGCGTGGGGAGCGAACAGGATTAGATACCCCTGGTAGTCCACGCC  
Ae168Ps1\_16S GACGCTGAGGAGCGAAAGCGTGGGGAGCGAACAGGATTAGATACCCCTGGTAGTCCACGCC  
Ae263Ps1\_16S GACGCTGAGGAGCGAAAGCGTGGGGAGCGAACAGGATTAGATACCCCTGGTAGTCCACGCC  
Ae356Ps1\_16S GACGCTGAGGAGCGAAAGCGTGGGGAGCGAACAGGATTAGATACCCCTGGTAGTCCACGCC  
\*\*\*\*\*

Ae706Ps2\_16S GTAAACGTTGGGCGTAGGTGTGGGGACCATTCACCGTTTCTGTGCCGAGCTAACGCA  
Ae717Ps2\_16S GTAAACGTTGGGCGTAGGTGTGGGGACCATTCACCGTTTCTGTGCCGAGCTAACGCA  
Ae505Ps2\_16S GTAAACGTTGGGCGTAGGTGTGGGGACCATTCACCGTTTCTGTGCCGAGCTAACGCA  
Ae406Ps2\_16S GTAAACGTTGGGCGTAGGTGTGGGGACCATTCACCGTTTCTGTGCCGAGCTAACGCA  
Ae331Ps2\_16S GTAAACGTTGGGCGTAGGTGTGGGGACCATTCACCGTTTCTGTGCCGAGCTAACGCA  
Ae150APs1\_16S GTAAACGTTGGGCGTAGGTGTGGGGACCATTCACCGTTTCTGTGCCGAGCTAACGCA



Ae707Ps1\_16S GTAAACGTTGGGCGCTAGGTGTGGGGACCATTCACGGTTTCTGCGCCGCAGCTAACGCA  
Ae168Ps1\_16S GTAAACGTTGGGCGCTAGGTGTGGGGACCATTCACGGTTTCTGCGCCGCAGCTAACGCA  
Ae263Ps1\_16S GTAAACGTTGGGCGCTAGGTGTGGGGACCATTCACGGTTTCTGCGCCGCAGCTAACGCA  
Ae356Ps1\_16S GTAAACGTTGGGCGCTAGGTGTGGGGACCATTCACGGTTTCTGCGCCGCAGCTAACGCA  
\*\*\*\*\*

Ae706Ps2\_16S TTAAGCGCCCCGCCTGGGGAGTACGGCCGCAAGGCTAAAACCTCAAAGGAATTGACGGGGG  
Ae717Ps2\_16S TTAAGCGCCCCGCCTGGGGAGTACGGCCGCAAGGCTAAAACCTCAAAGGAATTGACGGGGG  
Ae505Ps2\_16S TTAAGCGCCCCGCCTGGGGAGTACGGCCGCAAGGCTAAAACCTCAAAGGAATTGACGGGGG  
Ae406Ps2\_16S TTAAGCGCCCCGCCTGGGGAGTACGGCCGCAAGGCTAAAACCTCAAAGGAATTGACGGGGG  
Ae331Ps2\_16S TTAAGCGCCCCGCCTGGGGAGTACGGCCGCAAGGCTAAAACCTCAAAGGAATTGACGGGGG  
Ae150APs1\_16S TTAAGCGCCCCGCCTGGGGAGTACGGCCGCAAGGCTAAAACCTCAAAGGAATTGACGGGGG  
Ae707Ps1\_16S TTAAGCGCCCCGCCTGGGGAGTACGGCCGCAAGGCTAAAACCTCAAAGGAATTGACGGGGG  
Ae168Ps1\_16S TTAAGCGCCCCGCCTGGGGAGTACGGCCGCAAGGCTAAAACCTCAAAGGAATTGACGGGGG  
Ae263Ps1\_16S TTAAGCGCCCCGCCTGGGGAGTACGGCCGCAAGGCTAAAACCTCAAAGGAATTGACGGGGG  
Ae356Ps1\_16S TTAAGCGCCCCGCCTGGGGAGTACGGCCGCAAGGCTAAAACCTCAAAGGAATTGACGGGGG  
\*\*\*\*\*

Ae706Ps2\_16S CCCGCACAAGCGGCGGAGCATGTGGATTAATTCGATGCAACGCGAAGAACCTTACCTGGG  
Ae717Ps2\_16S CCCGCACAAGCGGCGGAGCATGTGGATTAATTCGATGCAACGCGAAGAACCTTACCTGGG  
Ae505Ps2\_16S CCCGCACAAGCGGCGGAGCATGTGGATTAATTCGATGCAACGCGAAGAACCTTACCTGGG  
Ae406Ps2\_16S CCCGCACAAGCGGCGGAGCATGTGGATTAATTCGATGCAACGCGAAGAACCTTACCTGGG  
Ae331Ps2\_16S CCCGCACAAGCGGCGGAGCATGTGGATTAATTCGATGCAACGCGAAGAACCTTACCTGGG  
Ae150APs1\_16S CCCGCACAAGCGGCGGAGCATGTGGATTAATTCGATGCAACGCGAAGAACCTTACCTGGG  
Ae707Ps1\_16S CCCGCACAAGCGGCGGAGCATGTGGATTAATTCGATGCAACGCGAAGAACCTTACCTGGG  
Ae168Ps1\_16S CCCGCACAAGCGGCGGAGCATGTGGATTAATTCGATGCAACGCGAAGAACCTTACCTGGG  
Ae263Ps1\_16S CCCGCACAAGCGGCGGAGCATGTGGATTAATTCGATGCAACGCGAAGAACCTTACCTGGG  
Ae356Ps1\_16S CCCGCACAAGCGGCGGAGCATGTGGATTAATTCGATGCAACGCGAAGAACCTTACCTGGG  
\*\*\*\*\*

Ae706Ps2\_16S TTTGACATGCACCAGACATCCCTAGAGATAGGGCTTCCCTTGTGGTTGGTGTGCAGGTGG  
Ae717Ps2\_16S TTTGACATGCACCAGACATCCCTAGAGATAGGGCTTCCCTTGTGGTTGGTGTGCAGGTGG  
Ae505Ps2\_16S TTTGACATGCACCAGACATCCCTAGAGATAGGGCTTCCCTTGTGGTTGGTGTGCAGGTGG  
Ae406Ps2\_16S TTTGACATGCACCAGACATCCCTAGAGATAGGGCTTCCCTTGTGGTTGGTGTGCAGGTGG  
Ae331Ps2\_16S TTTGACATGCACCAGACATCCCTAGAGATAGGGCTTCCCTTGTGGTTGGTGTGCAGGTGG  
Ae150APs1\_16S TTTGACATGCACCAGATCGCGGCAGAGATGTCGTTCCCTTGTGGCCTGTGTGCAGGTGG  
Ae707Ps1\_16S TTTGACATGCACAGGATCGCGGCAGAGATGTCGTTCCCTTGTGGCCTGTGTGCAGGTGG  
Ae168Ps1\_16S TTTGACATGCACAGGATCGCGGCAGAGATGTCGTTCCCTTGTGGCCTGTGTGCAGGTGG  
Ae263Ps1\_16S TTTGACATGCACAGGATCGCGGCAGAGATGTCGTTCCCTTGTGGCCTGTGTGCAGGTGG  
Ae356Ps1\_16S TTTGACATGCACAGGATCGCGGCAGAGATGTCGTTCCCTTGTGGCCTGTGTGCAGGTGG  
\*\*\*\*\*

Ae706Ps2\_16S TGCATGGCTGTCGTGAGTGTGGGTTAAGTCCCGCAACGAGCGCAA  
Ae717Ps2\_16S TGCATGGCTGTCGTGAGTGTGGGTTAAGTCCCGCAACGAGCGCAA  
Ae505Ps2\_16S TGCATGGCTGTCGTGAGTGTGGGTTAAGTCCCGCAACGAGCGCAA  
Ae406Ps2\_16S TGCATGGCTGTCGTGAGTGTGGGTTAAGTCCCGCAACGAGCGCAA  
Ae331Ps2\_16S TGCATGGCTGTCGTGAGTGTGGGTTAAGTCCCGCAACGAGCGCAA  
Ae150APs1\_16S TGCATGGCTGTCGTGAGTGTGGGTTAAGTCCCGCAACGAGCGCAA  
Ae707Ps1\_16S TGCATGGCTGTCGTGAGTGTGGGTTAAGTCCCGCAACGAGCGCAA  
Ae168Ps1\_16S TGCATGGCTGTCGTGAGTGTGGGTTAAGTCCCGCAACGAGCGCAA  
Ae263Ps1\_16S TGCATGGCTGTCGTGAGTGTGGGTTAAGTCCCGCAACGAGCGCAA  
Ae356Ps1\_16S TGCATGGCTGTCGTGAGTGTGGGTTAAGTCCCGCAACGAGCGCAA  
\*\*\*\*\*

Ae706Ps2\_16S CCCTTGTTCCATGTTGCCAGCACGTTATGGTGGGGACTCATGGGAGACTGCCGGGGTCAA  
Ae717Ps2\_16S CCCTTGTTCCATGTTGCCAGCACGTTATGGTGGGGACTCATGGGAGACTGCCGGGGTCAA  
Ae505Ps2\_16S CCCTTGTTCCATGTTGCCAGCACGTTATGGTGGGGACTCATGGGAGACTGCCGGGGTCAA  
Ae406Ps2\_16S CCCTTGTTCCATGTTGCCAGCACGTTATGGTGGGGACTCATGGGAGACTGCCGGGGTCAA  
Ae331Ps2\_16S CCCTTGTTCCATGTTGCCAGCACGTTATGGTGGGGACTCATGGGAGACTGCCGGGGTCAA  
Ae150APs1\_16S CCCTTATTCATGTTGCCAGCACGTTAGTGGTGGGGACTCATGGGAGACTGCCGGGGTCAA  
Ae707Ps1\_16S CCCTTATTCATGTTGCCAGCACGTTAGTGGTGGGGACTCATGGGAGACTGCCGGGGTCAA  
Ae168Ps1\_16S CCCTTATTCATGTTGCCAGCACGTTAGTGGTGGGGACTCATGGGAGACTGCCGGGGTCAA  
Ae263Ps1\_16S CCCTTATTCATGTTGCCAGCACGTTAGTGGTGGGGACTCATGGGAGACTGCCGGGGTCAA  
Ae356Ps1\_16S CCCTTATTCATGTTGCCAGCACGTTAGTGGTGGGGACTCATGGGAGACTGCCGGGGTCAA  
\*\*\*\*\*

Ae706Ps2\_16S CTCGGAGGAAGGTGGGGATGACGTCAGTCAAGTCATCATGCCCTTATGTCCAGGGCTTCACAC  
Ae717Ps2\_16S CTCGGAGGAAGGTGGGGATGACGTCAGTCAAGTCATCATGCCCTTATGTCCAGGGCTTCACAC  
Ae505Ps2\_16S CTCGGAGGAAGGTGGGGATGACGTCAGTCAAGTCATCATGCCCTTATGTCCAGGGCTTCACAC  
Ae406Ps2\_16S CTCGGAGGAAGGTGGGGATGACGTCAGTCAAGTCATCATGCCCTTATGTCCAGGGCTTCACAC  
Ae331Ps2\_16S CTCGGAGGAAGGTGGGGATGACGTCAGTCAAGTCATCATGCCCTTATGTCCAGGGCTTCACAC  
Ae150APs1\_16S CTCGGAGGAAGGTGGGGATGACGTCAGTCAAGTCATCATGCCCTTATGTCCAGGGCTTCACAC  
Ae707Ps1\_16S CTCGGAGGAAGGTGGGGATGACGTCAGTCAAGTCATCATGCCCTTATGTCCAGGGCTTCACAC  
Ae168Ps1\_16S CTCGGAGGAAGGTGGGGATGACGTCAGTCAAGTCATCATGCCCTTATGTCCAGGGCTTCACAC  
Ae263Ps1\_16S CTCGGAGGAAGGTGGGGATGACGTCAGTCAAGTCATCATGCCCTTATGTCCAGGGCTTCACAC  
Ae356Ps1\_16S CTCGGAGGAAGGTGGGGATGACGTCAGTCAAGTCATCATGCCCTTATGTCCAGGGCTTCACAC  
\*\*\*\*\*

Ae706Ps2\_16S ATGCTACAATGGCTCATAACAGAGGGGCTGCGAGACCGTGAGGTGGAGCGAATCCCTTAAAG  
Ae717Ps2\_16S ATGCTACAATGGCTCATAACAGAGGGGCTGCGAGACCGTGAGGTGGAGCGAATCCCTTAAAG  
Ae505Ps2\_16S ATGCTACAATGGCTCATAACAGAGGGGCTGCGAGACCGTGAGGTGGAGCGAATCCCTTAAAG  
Ae406Ps2\_16S ATGCTACAATGGCTCATAACAGAGGGGCTGCGAGACCGTGAGGTGGAGCGAATCCCTTAAAG  
Ae331Ps2\_16S ATGCTACAATGGCTCATAACAGAGGGGCTGCGAGACCGTGAGGTGGAGCGAATCCCTTAAAG  
Ae150APs1\_16S ATGCTACAATGGCTCATAACAGAGGGGCTGCGAGACCGTGAGGTGGAGCGAATCCCTTAAAG  
Ae707Ps1\_16S ATGCTACAATGGCTCATAACAGAGGGGCTGCGAGACTGTGAGGTGGAGCGAATCCCTTAAAG  
Ae168Ps1\_16S ATGCTACAATGGCTCATAACAGAGGGGCTGCGAGACCGTGAGGTGGAGCGAATCCCTTAAAG  
Ae263Ps1\_16S ATGCTACAATGGCTCATAACAGAGGGGCTGCGAGACCGTGAGGTGGAGCGAATCCCTTAAAG  
Ae356Ps1\_16S ATGCTACAATGGCTCATAACAGAGGGGCTGCGAGACCGTGAGGTGGAGCGAATCCCTTAAAG  
\*\*\*\*\*

Ae706Ps2\_16S TGAGTCTCAGTTCGGATCGGGGTCTGCAACTCGACCCCGTGAAGTTGGAGTCGCTAGTAA  
Ae717Ps2\_16S TGAGTCTCAGTTCGGATCGGGGTCTGCAACTCGACCCCGTGAAGTTGGAGTCGCTAGTAA  
Ae505Ps2\_16S TGAGTCTCAGTTCGGATCGGGGTCTGCAACTCGACCCCGTGAAGTTGGAGTCGCTAGTAA  
Ae406Ps2\_16S TGAGTCTCAGTTCGGATCGGGGTCTGCAACTCGACCCCGTGAAGTTGGAGTCGCTAGTAA  
Ae331Ps2\_16S TGAGTCTCAGTTCGGATCGGGGTCTGCAACTCGACCCCGTGAAGTTGGAGTCGCTAGTAA  
Ae150APs1\_16S TGAGTCTCAGTTCGGATCGGGGTCTGCAACTCGACCCCGTGAAGTTGGAGTCGCTAGTAA  
Ae707Ps1\_16S TGAGTCTCAGTTCGGATCGGGGTCTGCAACTCGACCCCGTGAAGTTGGAGTCGCTAGTAA  
Ae168Ps1\_16S TGAGTCTCAGTTCGGATCGGGGTCTGCAACTCGACCCCGTGAAGTTGGAGTCGCTAGTAA  
Ae263Ps1\_16S TGAGTCTCAGTTCGGATCGGGGTCTGCAACTCGACCCCGTGAAGTTGGAGTCGCTAGTAA  
Ae356Ps1\_16S TGAGTCTCAGTTCGGATCGGGGTCTGCAACTCGACCCCGTGAAGTTGGAGTCGCTAGTAA  
\*\*\*\*\*

Ae706Ps2\_16S TCGCAGATCAGCAACGCTGCGGTGAATACGTTCCCGGGCCTTGTACACACCCGCCGTCAC  
Ae717Ps2\_16S TCGCAGATCAGCAACGCTGCGGTGAATACGTTCCCGGGCCTTGTACACACCCGCCGTCAC  
Ae505Ps2\_16S TCGCAGATCAGCAACGCTGCGGTGAATACGTTCCCGGGCCTTGTACACACCCGCCGTCAC  
Ae406Ps2\_16S TCGCAGATCAGCAACGCTGCGGTGAATACGTTCCCGGGCCTTGTACACACCCGCCGTCAC  
Ae331Ps2\_16S TCGCAGATCAGCAACGCTGCGGTGAATACGTTCCCGGGCCTTGTACACACCCGCCGTCAC  
Ae150APs1\_16S TCGCAGATCAGCAACGCTGCGGTGAATACGTTCCCGGGCCTTGTACACACCCGCCGTCAC  
Ae707Ps1\_16S TCGCAGATCAGCAACGCTGCGGTGAATACGTTCCCGGGCCTTGTACACACCCGCCGTCAC  
Ae168Ps1\_16S TCGCAGATCAGCAACGCTGCGGTGAATACGTTCCCGGGCCTTGTACACACCCGCCGTCAC  
Ae263Ps1\_16S TCGCAGATCAGCAACGCTGCGGTGAATACGTTCCCGGGCCTTGTACACACCCGCCGTCAC  
Ae356Ps1\_16S TCGCAGATCAGCAACGCTGCGGTGAATACGTTCCCGGGCCTTGTACACACCCGCCGTCAC  
\*\*\*\*\*

Ae706Ps2\_16S GTCACGAAAGTTGGTAAACACCCGAAGCCGGCGGCCAACCCCTTGTGGAGGGAGCTGTCGA  
Ae717Ps2\_16S GTCACGAAAGTTGGTAAACACCCGAAGCTGGCGGCCAACCCCTTGTGGAGGGAGCTGTCGA  
Ae505Ps2\_16S GTCACGAAAGTTGGTAAACACCCGAAGCCGGCGGCCAACCCCTTGTGGAGGGAGCTGTCGA  
Ae406Ps2\_16S GTCACGAAAGTTGGTAAACACCCGAAGCCGGCGGCCAACCCCTTGTGGAGGGAGCTGTCGA  
Ae331Ps2\_16S GTCACGAAAGTTGGTAAACACCCGAAGCCGGCGGCCAACCCCTTGTGGAGGGAGCTGTCGA  
Ae150APs1\_16S GTCACGAAAGTTGGTAAACACCCGAAGCCGGCGGCCAACCCCTTGTGGAGGGAGCTGTCGA  
Ae707Ps1\_16S GTCACGAAAGTTGGTAAACACCCGAAGCCGGCGGCCAACCCCTTGTGGAGGGAGCTGTCGA  
Ae168Ps1\_16S GTCACGAAAGTTGGTAAACACCCGAAGCCGGCGGCCAACCCCTTGTGGAGGGAGCTGTCGA  
Ae263Ps1\_16S GTCACGAAAGTTGGTAAACACCCGAAGCCGGCGGCCAACCCCTTGTGGAGGGAGCTGTCGA  
Ae356Ps1\_16S GTCACGAAAGTTGGTAAACACCCGAAGCCGGCGGCCAACCCCTTGTGGAGGGAGCTGTCGA  
\*\*\*\*\*

Ae706Ps2\_16S AGGTGGGACTGGCGATTGGGACGAAGTCGTAACAAGGTAGCCGTACCGGAAGGTGCGGCT  
Ae717Ps2\_16S AGGTGGGACTGGCGATTGGGACGAAGTCGTAACAAGGTAGCCGTACCGGAAGGTGCGGCT  
Ae505Ps2\_16S AGGTGGGACTGGCGATTGGGACGAAGTCGTAACAAGGTAGCCGTACCGGAAGGTGCGGCT  
Ae406Ps2\_16S AGGTGGGACTGGCGATTGGGACGAAGTCGTAACAAGGTAGCCGTACCGGAAGGTGCGGCT  
Ae331Ps2\_16S AGGTGGGACTGGCGATTGGGACGAAGTCGTAACAAGGTAGCCGTACCGGAAGGTGCGGCT  
Ae150APs1\_16S AGGTGGGACTGGCGATTGGGACGAAGTCGTAACAAGGTAGCCGTACCGGAAGGTGCGGCT  
Ae707Ps1\_16S AGGTGGGACTGGCGATTGGGACGAAGTCGTAACAAGGTAGCCGTACCGGAAGGTGCGGCT  
Ae168Ps1\_16S AGGTGGGACTGGCGATTGGGACGAAGTCGTAACAAGGTAGCCGTACCGGAAGGTGCGGCT  
Ae263Ps1\_16S AGGTGGGACTGGCGATTGGGACGAAGTCGTAACAAGGTAGCCGTACCGGAAGGTGCGGCT  
Ae356Ps1\_16S AGGTGGGACTGGCGATTGGGACGAAGTCGTAACAAGGTAGCCGTACCGGAAGGTGCGGCT  
\*\*\*\*\*

Ae706Ps2\_16S GGATCACCT  
Ae717Ps2\_16S GGATCACCT  
Ae505Ps2\_16S GGATCACCT  
Ae406Ps2\_16S GGATCACCT  
Ae331Ps2\_16S GGATCACCT  
Ae150APs1\_16S GGATCACCT  
Ae707Ps1\_16S GGATCACCT  
Ae168Ps1\_16S GGATCACCT  
Ae263Ps1\_16S GGATCACCT  
Ae356Ps1\_16S GGATCACCT  
\*\*\*\*\*

**Supplementary Table 2. 16S rRNA gene percentage identity across *Pseudonocardia* strains.**

|                                 | <b>Ae150<br/>A_Ps1<br/>_16S</b> | <b>Ae168<br/>_Ps1_<br/>_16S</b> | <b>Ae263<br/>_Ps1_<br/>_16S</b> | <b>Ae356<br/>_Ps1_<br/>_16S</b> | <b>Ae707<br/>_Ps1_<br/>_16S</b> | <b>Ae331<br/>_Ps2_<br/>_16S</b> | <b>Ae406<br/>_Ps2_<br/>_16S</b> | <b>Ae505<br/>_Ps2_<br/>_16S</b> | <b>Ae706<br/>_Ps2_<br/>_16S</b> | <b>Ae717<br/>_Ps2_<br/>_16S</b> |
|---------------------------------|---------------------------------|---------------------------------|---------------------------------|---------------------------------|---------------------------------|---------------------------------|---------------------------------|---------------------------------|---------------------------------|---------------------------------|
| <b>Ae150<br/>A_Ps1<br/>_16S</b> | 100                             | 100                             | 100                             | 100                             | 99.93                           | 97.74                           | 97.74                           | 97.74                           | 97.74                           | 97.68                           |
| <b>Ae168<br/>_Ps1_<br/>_16S</b> | 100                             | 100                             | 100                             | 100                             | 99.93                           | 97.74                           | 97.74                           | 97.74                           | 97.74                           | 97.68                           |
| <b>Ae263<br/>_Ps1_<br/>_16S</b> | 100                             | 100                             | 100                             | 100                             | 99.93                           | 97.74                           | 97.74                           | 97.74                           | 97.74                           | 97.68                           |
| <b>Ae356<br/>_Ps1_<br/>_16S</b> | 100                             | 100                             | 100                             | 100                             | 99.93                           | 97.74                           | 97.74                           | 97.74                           | 97.74                           | 97.68                           |
| <b>Ae707<br/>_Ps1_<br/>_16S</b> | 99.93                           | 99.93                           | 99.93                           | 99.93                           | 100                             | 97.68                           | 97.68                           | 97.68                           | 97.68                           | 97.61                           |
| <b>Ae331<br/>_Ps2_<br/>_16S</b> | 97.74                           | 97.74                           | 97.74                           | 97.74                           | 97.68                           | 100                             | 100                             | 100                             | 100                             | 99.93                           |
| <b>Ae406<br/>_Ps2_<br/>_16S</b> | 97.74                           | 97.74                           | 97.74                           | 97.74                           | 97.68                           | 100                             | 100                             | 100                             | 100                             | 99.93                           |
| <b>Ae505<br/>_Ps2_<br/>_16S</b> | 97.74                           | 97.74                           | 97.74                           | 97.74                           | 97.68                           | 100                             | 100                             | 100                             | 100                             | 99.93                           |
| <b>Ae706<br/>_Ps2_<br/>_16S</b> | 97.74                           | 97.74                           | 97.74                           | 97.74                           | 97.68                           | 100                             | 100                             | 100                             | 100                             | 99.93                           |
| <b>Ae717<br/>_Ps2_<br/>_16S</b> | 97.68                           | 97.68                           | 97.68                           | 97.68                           | 97.61                           | 99.93                           | 99.93                           | 99.93                           | 99.93                           | 100                             |

***Pseudonocardia rpsL* gene alignment;**

```

Ae706Ps2_rpsL      ATGCCACGATCCAGCAGCTGGTCCGCAAGGGCCGCGAGGACAAGGTCTCCAAGACCAAG
Ae717Ps2_rpsL      ATGCCACGATCCAGCAGCTGGTCCGCAAGGGCCGCGAGGACAAGGTCTCCAAGACCAAG
Ae505Ps2_rpsL      ATGCCACGATCCAGCAGCTGGTCCGCAAGGGCCGCGAGGACAAGGTCTCCAAGACCAAG
Ae406Ps2_rpsL      ATGCCACGATCCAGCAGCTGGTCCGCAAGGGCCGCGAGGACAAGGTCTCCAAGACCAAG
Ae331Ps2_rpsL      ATGCCACGATCCAGCAGCTGGTCCGCAAGGGCCGCGAGGACAAGGTCTCCAAGACCAAG
Ae150APs1_rpsL     ATGCCACGATCCAGCAGCTGGTCCGCAAGGGCCGCGAGGACAAGGTCTCCAAGACCAAG
Ae168APs1_rpsL     ATGCCACGATCCAGCAGCTGGTCCGCAAGGGCCGCGAGGACAAGGTCTCCAAGACCAAG
Ae263APs1_rpsL     ATGCCACGATCCAGCAGCTGGTCCGCAAGGGCCGCGAGGACAAGGTCTCCAAGACCAAG
Ae356Ps1_rpsL      ATGCCACGATCCAGCAGCTGGTCCGCAAGGGCCGCGAGGACAAGGTCTCCAAGACCAAG
Ae707Ps1_rpsL      ATGCCACGATCCAGCAGCTGGTCCGCAAGGGCCGCGAGGACAAGGTCTCCAAGACCAAG
*****

```

```

Ae706Ps2_rpsL      ACCGCCGCGCTGAAGGGAAGCCCCAGCGCCGCGGGGTCTGCACCCGCGTGTACACCACC
Ae717Ps2_rpsL      ACCGCCGCGCTGAAGGGAAGCCCCAGCGCCGCGGGGTCTGCACCCGCGTGTACACCACC
Ae505Ps2_rpsL      ACCGCCGCGCTGAAGGGAAGCCCCAGCGCCGCGGGGTCTGCACCCGCGTGTACACCACC
Ae406Ps2_rpsL      ACCGCCGCGCTGAAGGGAAGCCCCAGCGCCGCGGGGTCTGCACCCGCGTGTACACCACC
Ae331Ps2_rpsL      ACCGCCGCGCTGAAGGGAAGCCCCAGCGCCGCGGGGTCTGCACCCGCGTGTACACCACC
Ae150APs1_rpsL     ACCGCCGCGCTGAAGGGAAGCCCCAGCGCCGCGGGGTCTGCACCCGCGTGTACACCACC
Ae168APs1_rpsL     ACCGCCGCGCTGAAGGGAAGCCCCAGCGCCGCGGGGTCTGCACCCGCGTGTACACCACC
Ae263APs1_rpsL     ACCGCCGCGCTGAAGGGAAGCCCCAGCGCCGCGGGGTCTGCACCCGCGTGTACACCACC
Ae356Ps1_rpsL      ACCGCCGCGCTGAAGGGAAGCCCCAGCGCCGCGGGGTCTGCACCCGCGTGTACACCACC
Ae707Ps1_rpsL      ACCGCCGCGCTGAAGGGAAGCCCCAGCGCCGCGGGGTCTGCACCCGCGTGTACACCACC
*****

```



**Supplementary Table 3. *rpsL* gene percentage identity across *Pseudonocardia* strains.**

|                                        | <b>Ae150<br/>A_Ps1<br/><i>rpsL</i></b> | <b>Ae168<br/>A_Ps1<br/><i>rpsL</i></b> | <b>Ae263<br/>A_Ps1<br/><i>rpsL</i></b> | <b>Ae35<br/>6_Ps1<br/><i>rpsL</i></b> | <b>Ae70<br/>7_Ps1<br/><i>rpsL</i></b> | <b>Ae33<br/>1_Ps2<br/><i>rpsL</i></b> | <b>Ae40<br/>6_Ps2<br/><i>rpsL</i></b> | <b>Ae50<br/>5_Ps2<br/><i>rpsL</i></b> | <b>Ae70<br/>6_Ps2<br/><i>rpsL</i></b> | <b>Ae71<br/>7_Ps2<br/><i>rpsL</i></b> |
|----------------------------------------|----------------------------------------|----------------------------------------|----------------------------------------|---------------------------------------|---------------------------------------|---------------------------------------|---------------------------------------|---------------------------------------|---------------------------------------|---------------------------------------|
| <b>Ae150<br/>A_Ps1<br/><i>rpsL</i></b> | 100                                    | 100                                    | 100                                    | 100                                   | 100                                   | 92.8                                  | 92.8                                  | 92.8                                  | 92.8                                  | 92.8                                  |
| <b>Ae168<br/>A_Ps1<br/><i>rpsL</i></b> | 100                                    | 100                                    | 100                                    | 100                                   | 100                                   | 92.8                                  | 92.8                                  | 92.8                                  | 92.8                                  | 92.8                                  |
| <b>Ae263<br/>A_Ps1<br/><i>rpsL</i></b> | 100                                    | 100                                    | 100                                    | 100                                   | 100                                   | 92.8                                  | 92.8                                  | 92.8                                  | 92.8                                  | 92.8                                  |
| <b>Ae356<br/>Ps1_r<br/><i>psL</i></b>  | 100                                    | 100                                    | 100                                    | 100                                   | 100                                   | 92.8                                  | 92.8                                  | 92.8                                  | 92.8                                  | 92.8                                  |
| <b>Ae707<br/>_Ps1_r<br/><i>psL</i></b> | 100                                    | 100                                    | 100                                    | 100                                   | 100                                   | 92.8                                  | 92.8                                  | 92.8                                  | 92.8                                  | 92.8                                  |
| <b>Ae331<br/>_Ps2_r<br/><i>psL</i></b> | 92.8                                   | 92.8                                   | 92.8                                   | 92.8                                  | 92.8                                  | 100                                   | 100                                   | 100                                   | 100                                   | 100                                   |
| <b>Ae406<br/>_Ps2_r<br/><i>psL</i></b> | 92.8                                   | 92.8                                   | 92.8                                   | 92.8                                  | 92.8                                  | 100                                   | 100                                   | 100                                   | 100                                   | 100                                   |
| <b>Ae505<br/>_Ps2_r<br/><i>psL</i></b> | 92.8                                   | 92.8                                   | 92.8                                   | 92.8                                  | 92.8                                  | 100                                   | 100                                   | 100                                   | 100                                   | 100                                   |
| <b>Ae706<br/>_Ps2_r<br/><i>psL</i></b> | 92.8                                   | 92.8                                   | 92.8                                   | 92.8                                  | 92.8                                  | 100                                   | 100                                   | 100                                   | 100                                   | 100                                   |
| <b>Ae717<br/>_Ps2_r<br/><i>psL</i></b> | 92.8                                   | 92.8                                   | 92.8                                   | 92.8                                  | 92.8                                  | 100                                   | 100                                   | 100                                   | 100                                   | 100                                   |

***Pseudonocardia rpoB* gene alignment;**

```

Ae331Ps2_rpoB      TTGGCTGTCTCCCGCGCCGCGCGACACCTCGACCCTCTCCGCTTCGGCGAACCCGAAC
Ae505Ps2_rpoB      TTGGCTGTCTCCCGCGCCGCGCGACACCTCGACCCTCTCCGCTTCGGCGAACCCGAAC
Ae406Ps2_rpoB      TTGGCTGTCTCCCGCGCCGCGCGACACCTCGACCCTCTCCGCTTCGGCGAACCCGAAC
Ae717Ps2_rpoB      TTGGCTGTCTCCCGCGCCGCGCGACACCTCGACCCTCTCCGCTTCGGCGAACCCGAAC
Ae706Ps2_rpoB      TTGGCTGTCTCCCGCGCCGCGCGACACCTCGACCCTCTCCGCTTCGGCGAACCCGAAC
Ae150Aps1_rpoB     TTGGCTGTCTCCCGCGCCGCGCGACACCTCGACCCTCTCCGCTTCGGCGAACCCGAAC
Ae168Ps1_rpoB      TTGGCTGTCTCCCGCGCCGCGCGACACCTCGACCCTCTCCGCTTCGGCGAACCCGAAC
Ae263Ps1_rpoB      TTGGCTGTCTCCCGCGCCGCGCGACACCTCGACCCTCTCCGCTTCGGCGAACCCGAAC
Ae356Ps1_rpoB      TTGGCTGTCTCCCGCGCCGCGCGACACCTCGACCCTCTCCGCTTCGGCGAACCCGAAC
Ae707Ps1_rpoB      TTGGCTGTCTCCCGCGCCGCGCGACACCTCGACCCTCTCCGCTTCGGCGAACCCGAAC
*****

```

```

Ae331Ps2_rpoB      TACCCCGGCGCACCCACCCGGGTCACCTTCGCGAAGATCGCCAGCCGTTGGAGGTCCCC
Ae505Ps2_rpoB      TGCCCGGCGCACCCACCCGGGTCACCTTCGCGAAGATCGCCAGCCGTTGGAGGTCCCC
Ae406Ps2_rpoB      TACCCCGGCGCACCCACCCGGGTCACCTTCGCGAAGATCGCCAGCCGTTGGAGGTCCCC
Ae717Ps2_rpoB      TACCCCGGCGCACCCACCCGGGTCACCTTCGCGAAGATCGCCAGCCGTTGGAGGTCCCC
Ae706Ps2_rpoB      TACCCCGGCGCACCCACCCGGGTCACCTTCGCGAAGATCGCCAGCCGTTGGAGGTCCCC
Ae150Aps1_rpoB     TACCCCGGTGCACCCACTCGGGTCACCTTCGCGAAGATCTCCGAGCCGCTGGAGGTCCCG
Ae168Ps1_rpoB      TACCCCGGTGCACCCACTCGGGTCACCTTCGCGAAGATCTCCGAGCCGCTGGAGGTCCCG
Ae263Ps1_rpoB      TACCCCGGTGCACCCACTCGGGTCACCTTCGCGAAGATCTCCGAGCCGCTGGAGGTCCCG
Ae356Ps1_rpoB      TACCCCGGTGCACCCACTCGGGTCACCTTCGCGAAGATCTCCGAGCCGCTGGAGGTCCCG
Ae707Ps1_rpoB      TACCCCGGTGCACCCACTCGGGTCACCTTCGCGAAGATCTCCGAGCCGCTGGAGGTCCCG
* * * * *

```

Ae331Ps2\_rpoB GACCTTCTCGACCTGCAGATCCAGTCCCTACGAGTGGCTGGTCGGCAGCGAGGCCCTGGTTC  
Ae505Ps2\_rpoB GACCTTCTCGACCTGCAGATCCAGTCCCTACGAGTGGCTGGTCGGCAGCGAGGCCCTGGTTC  
Ae406Ps2\_rpoB GACCTTCTCGACCTGCAGATCCAGTCCCTACGAGTGGCTGGTCGGCAGCGAGGCCCTGGTTC  
Ae717Ps2\_rpoB GACCTTCTCGACCTGCAGATCCAGTCCCTACGAGTGGCTGGTCGGCAGCGAGGCCCTGGTTC  
Ae706Ps2\_rpoB GACCTTCTCGACCTGCAGATCCAGTCCCTACGAGTGGCTGGTCGGCAGCGAGGCCCTGGTTC  
Ae150APs1\_rpoB GACCTCCTCGACCTGCAGATCCAGTCCCTACGAGTGGCTCGTCGGCAGCGAGGCCCTGGTTC  
Ae168Ps1\_rpoB GACCTCCTCGACCTGCAGATCCAGTCCCTACGAGTGGCTCGTCGGCAGCGAGGCCCTGGTTC  
Ae263Ps1\_rpoB GACCTCCTCGACCTGCAGATCCAGTCCCTACGAGTGGCTCGTCGGCAGCGAGGCCCTGGTTC  
Ae356Ps1\_rpoB GACCTCCTCGACCTGCAGATCCAGTCCCTACGAGTGGCTCGTCGGCAGCGAGGCCCTGGTTC  
Ae707Ps1\_rpoB GACCTCCTCGACCTGCAGATCCAGTCCCTACGAGTGGCTCGTCGGCAGCGAGGCCCTGGTTC  
\*\*\*\*\*

Ae331Ps2\_rpoB CAGCGCCGGATCGAGGCCGGTGACGAGCTTCCGGTGAGCGGTCTGGAGGAGATCCTCACC  
Ae505Ps2\_rpoB CAGCGCCGGATCGAGGCCGGTGACGAGCTTCCGGTGAGCGGTCTGGAGGAGATCCTCACC  
Ae406Ps2\_rpoB CAGCGCCGGATCGAGGCCGGTGACGAGCTTCCGGTGAGCGGTCTGGAGGAGATCCTCACC  
Ae717Ps2\_rpoB CAGCGCCGGATCGAGGCCGGTGACGAGCTTCCGGTGAGCGGTCTGGAGGAGATCCTCACC  
Ae706Ps2\_rpoB CAGCGCCGGATCGAGGCCGGTGACGAGCTTCCGGTGAGCGGTCTGGAGGAGATCCTCACC  
Ae150APs1\_rpoB CAGCGCCGGATCGAGGCCGGCGACGACCTCCCGTGAGCGGTCTCGAGGAGATCCTCACC  
Ae168Ps1\_rpoB CAGCGCCGGATCGAGGCCGGCGACGACCTCCCGTGAGCGGTCTCGAGGAGATCCTCACC  
Ae263Ps1\_rpoB CAGCGCCGGATCGAGGCCGGCGACGACCTCCCGTGAGCGGTCTCGAGGAGATCCTCACC  
Ae356Ps1\_rpoB CAGCGCCGGATCGAGGCCGGCGACGACCTCCCGTGAGCGGTCTCGAGGAGATCCTCACC  
Ae707Ps1\_rpoB CAGCGCCGGATCGAGGCCGGCGACGACCTCCCGTGAGCGGTCTCGAGGAGATCCTCACC  
\*\*\*\*\*

Ae331Ps2\_rpoB GAGATCTCGCCGATCGAGGACTTCTCCGGTTCGATGTCGTCGTCCTTCTCCGACCTCGC  
Ae505Ps2\_rpoB GAGATCTCGCCGATCGAGGACTTCTCCGGTTCGATGTCGTCGTCCTTCTCCGACCTCGC  
Ae406Ps2\_rpoB GAGATCTCGCCGATCGAGGACTTCTCCGGTTCGATGTCGTCGTCCTTCTCCGACCTCGC  
Ae717Ps2\_rpoB GAGATCTCGCCGATCGAGGACTTCTCCGGTTCGATGTCGTCGTCCTTCTCCGACCTCGC  
Ae706Ps2\_rpoB GAGATCTCGCCGATCGAGGACTTCTCCGGTTCGATGTCGTCGTCCTTCTCCGACCTCGC  
Ae150APs1\_rpoB GAGATCTCCCGATCGAGGACTTCTCCGGTTCGATGTCGTCGTCCTTCTCCGACCTCGC  
Ae168Ps1\_rpoB GAGATCTCCCGATCGAGGACTTCTCCGGTTCGATGTCGTCGTCCTTCTCCGACCTCGC  
Ae263Ps1\_rpoB GAGATCTCCCGATCGAGGACTTCTCCGGTTCGATGTCGTCGTCCTTCTCCGACCTCGC  
Ae356Ps1\_rpoB GAGATCTCCCGATCGAGGACTTCTCCGGTTCGATGTCGTCGTCCTTCTCCGACCTCGC  
Ae707Ps1\_rpoB GAGATCTCCCGATCGAGGACTTCTCCGGTTCGATGTCGTCGTCCTTCTCCGACCTCGC  
\*\*\*\*\*

Ae331Ps2\_rpoB TTCGACGAGGTCAAGGCCTCCGTCGAGGAGTCCCGGGACAAGGACATGACCTACGGTGCC  
Ae505Ps2\_rpoB TTCGACGAGGTCAAGGCCTCCGTCGAGGAGTCCCGGGACAAGGACATGACCTACGGTGCC  
Ae406Ps2\_rpoB TTCGACGAGGTCAAGGCCTCCGTCGAGGAGTCCCGGGACAAGGACATGACCTACGGTGCC  
Ae717Ps2\_rpoB TTCGACGAGGTCAAGGCCTCCGTCGAGGAGTCCCGGGACAAGGACATGACCTACGGTGCC  
Ae706Ps2\_rpoB TTCGACGAGGTCAAGGCCTCCGTCGAGGAGTCCCGGGACAAGGACATGACCTACGGTGCC  
Ae150APs1\_rpoB TTCGACGAGGTCAAGGCCTCCGTCGAGGAGTCCCGGGACAAGGACATGACCTACGGTGCC  
Ae168Ps1\_rpoB TTCGACGAGGTCAAGGCCTCCGTCGAGGAGTCCCGGGACAAGGACATGACCTACGGTGCC  
Ae263Ps1\_rpoB TTCGACGAGGTCAAGGCCTCCGTCGAGGAGTCCCGGGACAAGGACATGACCTACGGTGCC  
Ae356Ps1\_rpoB TTCGACGAGGTCAAGGCCTCCGTCGAGGAGTCCCGGGACAAGGACATGACCTACGGTGCC  
Ae707Ps1\_rpoB TTCGACGAGGTCAAGGCCTCCGTCGAGGAGTCCCGGGACAAGGACATGACCTACGGTGCC  
\*\*\*\*\*

Ae331Ps2\_rpoB CCGCTGTTTCGTCACGGCGGAGTTCACCAACAACACCACCGGTGAGATCAAGTCCCAGACC  
Ae505Ps2\_rpoB CCGCTGTTTCGTCACGGCGGAGTTCACCAACAACACCACCGGTGAGATCAAGTCCCAGACC  
Ae406Ps2\_rpoB CCGCTGTTTCGTCACGGCGGAGTTCACCAACAACACCACCGGTGAGATCAAGTCCCAGACC  
Ae717Ps2\_rpoB CCGCTGTTTCGTCACGGCGGAGTTCACCAACAACACCACCGGTGAGATCAAGTCCCAGACC  
Ae706Ps2\_rpoB CCGCTGTTTCGTCACGGCGGAGTTCACCAACAACACCACCGGTGAGATCAAGTCCCAGACC  
Ae150APs1\_rpoB CCGCTGTTTCGTCACGGCGGAGTTCACCAACAACACCACCGGTGAGATCAAGTCCCAGACC  
Ae168Ps1\_rpoB CCGCTGTTTCGTCACGGCGGAGTTCACCAACAACACCACCGGTGAGATCAAGTCCCAGACC  
Ae263Ps1\_rpoB CCGCTGTTTCGTCACGGCGGAGTTCACCAACAACACCACCGGTGAGATCAAGTCCCAGACC  
Ae356Ps1\_rpoB CCGCTGTTTCGTCACGGCGGAGTTCACCAACAACACCACCGGTGAGATCAAGTCCCAGACC  
Ae707Ps1\_rpoB CCGCTGTTTCGTCACGGCGGAGTTCACCAACAACACCACCGGTGAGATCAAGTCCCAGACC  
\*\*\*\*\*

Ae331Ps2\_rpoB GTCTTCATGGGCGAGTTCGCCGTGATGACCGACAAGGGCACGTTTCATCATCAACGGCACC  
Ae505Ps2\_rpoB GTCTTCATGGGCGAGTTCGCCGTGATGACCGACAAGGGCACGTTTCATCATCAACGGCACC  
Ae406Ps2\_rpoB GTCTTCATGGGCGAGTTCGCCGTGATGACCGACAAGGGCACGTTTCATCATCAACGGCACC  
Ae717Ps2\_rpoB GTCTTCATGGGCGAGTTCGCCGTGATGACCGACAAGGGCACGTTTCATCATCAACGGCACC  
Ae706Ps2\_rpoB GTCTTCATGGGCGAGTTCGCCGTGATGACCGACAAGGGCACGTTTCATCATCAACGGCACC  
Ae150APs1\_rpoB GTGTTTCATGGGTGAGTTCGCCGTGATGACCGACAAGGGCACCTTCATCATCAACGGCACC  
Ae168Ps1\_rpoB GTGTTTCATGGGTGAGTTCGCCGTGATGACCGACAAGGGCACCTTCATCATCAACGGCACC  
Ae263Ps1\_rpoB GTGTTTCATGGGTGAGTTCGCCGTGATGACCGACAAGGGCACCTTCATCATCAACGGCACC  
Ae356Ps1\_rpoB GTGTTTCATGGGTGAGTTCGCCGTGATGACCGACAAGGGCACCTTCATCATCAACGGCACC  
Ae707Ps1\_rpoB GTGTTTCATGGGTGAGTTCGCCGTGATGACCGACAAGGGCACCTTCATCATCAACGGCACC  
\*\* \*\*\*\*\*

Ae331Ps2\_rpoB GAGCGCGTCGTCGTCGTCGAGTCCGTTCCGCGGGTGTCTACTTCGACCACGCGATC  
Ae505Ps2\_rpoB GAGCGCGTCGTCGTCGTCGAGTCCGTTCCGCGGGTGTCTACTTCGACCACGCGATC  
Ae406Ps2\_rpoB GAGCGCGTCGTCGTCGTCGAGTCCGTTCCGCGGGTGTCTACTTCGACCACGCGATC  
Ae717Ps2\_rpoB GAGCGCGTCGTCGTCGTCGAGTCCGTTCCGCGGGTGTCTACTTCGACCACGCGATC  
Ae706Ps2\_rpoB GAGCGCGTCGTCGTCGTCGAGTCCGTTCCGCGGGTGTCTACTTCGACCACGCGATC

Ae150Aps1\_rpoB GAGCGCGTTCGTCGTGTCGCAGCTCGTCCGGTCGCCGGGTGTGTACTTCGACCACTCGATC  
Ae168Ps1\_rpoB GAGCGCGTTCGTCGTGTCGCAGCTCGTCCGGTCGCCGGGTGTGTACTTCGACCACTCGATC  
Ae263Ps1\_rpoB GAGCGCGTTCGTCGTGTCGCAGCTCGTCCGGTCGCCGGGTGTGTACTTCGACCACTCGATC  
Ae356Ps1\_rpoB GAGCGCGTTCGTCGTGTCGCAGCTCGTCCGGTCGCCGGGTGTGTACTTCGACCACTCGATC  
Ae707Ps1\_rpoB GAGCGCGTTCGTCGTGTCGCAGCTCGTCCGGTCGCCGGGTGTGTACTTCGACCACTCGATC  
\*\*\*\*\*

Ae331Ps2\_rpoB GACAAGACGACCCGAGAAGGACGCTACTCGGTCAAGATCATCCCAGCCGGGGCGCGTGG  
Ae505Ps2\_rpoB GACAAGACGACCCGAGAAGGACGCTACTCGGTCAAGATCATCCCAGCCGGGGCGCGTGG  
Ae406Ps2\_rpoB GACAAGACGACCCGAGAAGGACGCTACTCGGTCAAGATCATCCCAGCCGGGGCGCGTGG  
Ae717Ps2\_rpoB GACAAGACGACCCGAGAAGGACGCTACTCGGTCAAGATCATCCCAGCCGGGGCGCGTGG  
Ae706Ps2\_rpoB GACAAGACGACCCGAGAAGGACGCTACTCGGTCAAGATCATCCCAGCCGGGGCGCGTGG  
Ae150Aps1\_rpoB GACAAGACGACCCGAGAAGGACGCTACTCGGTCAAGATCATCCCAGCCGGGGTGCCTGG  
Ae168Ps1\_rpoB GACAAGACGACCCGAGAAGGACGCTACTCGGTCAAGATCATCCCAGCCGGGGTGCCTGG  
Ae263Ps1\_rpoB GACAAGACGACCCGAGAAGGACGCTACTCGGTCAAGATCATCCCAGCCGGGGTGCCTGG  
Ae356Ps1\_rpoB GACAAGACGACCCGAGAAGGACGCTACTCGGTCAAGATCATCCCAGCCGGGGTGCCTGG  
Ae707Ps1\_rpoB GACAAGACGACCCGAGAAGGACGCTACTCGGTCAAGATCATCCCAGCCGGGGTGCATGG  
\*\*\*\*\*

Ae331Ps2\_rpoB CTGGAGTTCGACGTCGACAAGCGCGACACCGTCCGGTGTCCGCATCGACCCGCAAGCGCCG  
Ae505Ps2\_rpoB CTGGAGTTCGACGTCGACAAGCGCGACACCGTCCGGTGTCCGCATCGACCCGCAAGCGCCG  
Ae406Ps2\_rpoB CTGGAGTTCGACGTCGACAAGCGCGACACCGTCCGGTGTCCGCATCGACCCGCAAGCGCCG  
Ae717Ps2\_rpoB CTGGAGTTCGACGTCGACAAGCGCGACACCGTCCGGTGTCCGCATCGACCCGCAAGCGCCG  
Ae706Ps2\_rpoB CTGGAGTTCGACGTCGACAAGCGCGACACCGTCCGGTGTCCGCATCGACCCGCAAGCGCCG  
Ae150Aps1\_rpoB CTGGAGTTCGACGTCGACAAGCGCGACACCGTCCGGTGTCCGCATCGACCCGCAAGCGCCG  
Ae168Ps1\_rpoB CTGGAGTTCGACGTCGACAAGCGCGACACCGTCCGGTGTCCGCATCGACCCGCAAGCGCCG  
Ae263Ps1\_rpoB CTGGAGTTCGACGTCGACAAGCGCGACACCGTCCGGTGTCCGCATCGACCCGCAAGCGCCG  
Ae356Ps1\_rpoB CTGGAGTTCGACGTCGACAAGCGCGACACCGTCCGGTGTCCGCATCGACCCGCAAGCGCCG  
Ae707Ps1\_rpoB CTGGAGTTCGACGTCGACAAGCGCGACACCGTCCGGTGTCCGCATCGACCCGCAAGCGCCG  
\*\*\*\*\*

Ae331Ps2\_rpoB CAGCCGGTACCCTGCTGCTGAAGGCCCTGGGCTGGACCCGCGAGCAGATCGGTGAGCGT  
Ae505Ps2\_rpoB CAGCCGGTACCCTGCTGCTGAAGGCCCTGGGCTGGACCCGCGAGCAGATCGGTGAGCGT  
Ae406Ps2\_rpoB CAGCCGGTACCCTGCTGCTGAAGGCCCTGGGCTGGACCCGCGAGCAGATCGGTGAGCGT  
Ae717Ps2\_rpoB CAGCCGGTACCCTGCTGCTGAAGGCCCTGGGCTGGACCCGCGAGCAGATCGGTGAGCGT  
Ae706Ps2\_rpoB CAGCCGGTACCCTGCTGCTGAAGGCCCTGGGCTGGACCCGCGAGCAGATCGGTGAGCGT  
Ae150Aps1\_rpoB CAGCCGGTACCCTGCTGCTGAAGGCCCTGGGCTGGACCCGCGAGCAGATCGGTGAGCGT  
Ae168Ps1\_rpoB CAGCCGGTACCCTGCTGCTGAAGGCCCTGGGCTGGACCCGCGAGCAGATCGGTGAGCGT  
Ae263Ps1\_rpoB CAGCCGGTACCCTGCTGCTGAAGGCCCTGGGCTGGACCCGCGAGCAGATCGGTGAGCGT  
Ae356Ps1\_rpoB CAGCCGGTACCCTGCTGCTGAAGGCCCTGGGCTGGACCCGCGAGCAGATCGGTGAGCGT  
Ae707Ps1\_rpoB CAGCCGGTACCCTGCTGCTGAAGGCCCTGGGCTGGACCCGCGAGCAGATCGGTGAGCGT  
\*\*\*\*\*

Ae331Ps2\_rpoB TTCGGGTTTCCGAGACGATCATGACGACGCTCGAGAAGGACAACACCCGCGGGCCAGGAC  
Ae505Ps2\_rpoB TTCGGGTTTCCGAGACGATCATGACGACGCTCGAGAAGGACAACACCCGCGGGCCAGGAC  
Ae406Ps2\_rpoB TTCGGGTTTCCGAGACGATCATGACGACGCTCGAGAAGGACAACACCCGCGGGCCAGGAC  
Ae717Ps2\_rpoB TTCGGGTTTCCGAGACGATCATGACGACGCTCGAGAAGGACAACACCCGCGGGCCAGGAC  
Ae706Ps2\_rpoB TTCGGGTTTCCGAGACGATCATGACGACGCTCGAGAAGGACAACACCCGCGGGCCAGGAC  
Ae150Aps1\_rpoB TTCGGGTTTCCGAGACGATCATGACGACGCTCGAGAAGGACAACACCCGCGGGTCAAGGAC  
Ae168Ps1\_rpoB TTCGGGTTTCCGAGACGATCATGACGACGCTCGAGAAGGACAACACCCGCGGGTCAAGGAC  
Ae263Ps1\_rpoB TTCGGGTTTCCGAGACGATCATGACGACGCTCGAGAAGGACAACACCCGCGGGTCAAGGAC  
Ae356Ps1\_rpoB TTCGGGTTTCCGAGACGATCATGACGACGCTCGAGAAGGACAACACCCGCGGGTCAAGGAC  
Ae707Ps1\_rpoB TTCGGGTTTCCGAGACGATCATGACGACGCTCGAGAAGGACAACACCCGCGGGTCAAGGAC  
\*\*\*\*\*

Ae331Ps2\_rpoB GAGGCGTGTCTCGACATCTACCGCAAGCTGCGCCCCGGCGAGCCCGGACGCGGAGTCCG  
Ae505Ps2\_rpoB GAGGCGTGTCTCGACATCTACCGCAAGCTGCGCCCCGGCGAGCCCGGACGCGGAGTCCG  
Ae406Ps2\_rpoB GAGGCGTGTCTCGACATCTACCGCAAGCTGCGCCCCGGCGAGCCCGGACGCGGAGTCCG  
Ae717Ps2\_rpoB GAGGCGTGTCTCGACATCTACCGCAAGCTGCGCCCCGGCGAGCCCGGACGCGGAGTCCG  
Ae706Ps2\_rpoB GAGGCGTGTCTCGACATCTACCGCAAGCTGCGCCCCGGCGAGCCCGGACGCGGAGTCCG  
Ae150Aps1\_rpoB GAGGCGTGTCTCGACATCTACCGCAAGCTGCGCCCCGGTGTAGCCCGGACGCGGAGAGC  
Ae168Ps1\_rpoB GAGGCGTGTCTCGACATCTACCGCAAGCTGCGCCCCGGTGTAGCCCGGACGCGGAGAGC  
Ae263Ps1\_rpoB GAGGCGTGTCTCGACATCTACCGCAAGCTGCGCCCCGGTGTAGCCCGGACGCGGAGAGC  
Ae356Ps1\_rpoB GAGGCGTGTCTCGACATCTACCGCAAGCTGCGCCCCGGTGTAGCCCGGACGCGGAGAGC  
Ae707Ps1\_rpoB GAGGCGTGTCTCGACATCTACCGCAAGCTGCGCCCCGGTGTAGCCCGGACGCGGAGAGC  
\*\*\*\*\*

Ae331Ps2\_rpoB GCCCAGGCGCTCCTGGAGAACCTGTTCTTCAAGGACAAGCGCTACGACATGGCCAAGGTC  
Ae505Ps2\_rpoB GCCCAGGCGCTCCTGGAGAACCTGTTCTTCAAGGACAAGCGCTACGACATGGCCAAGGTC  
Ae406Ps2\_rpoB GCCCAGGCGCTCCTGGAGAACCTGTTCTTCAAGGACAAGCGCTACGACATGGCCAAGGTC  
Ae717Ps2\_rpoB GCCCAGGCGCTCCTGGAGAACCTGTTCTTCAAGGACAAGCGCTACGACATGGCCAAGGTC  
Ae706Ps2\_rpoB GCCCAGGCGCTCCTGGAGAACCTGTTCTTCAAGGACAAGCGCTACGACATGGCCAAGGTC  
Ae150Aps1\_rpoB GCCCAGGCGCTCCTGGAGAACCTGTTCTTCAAGGACAAGCGCTACGACATGGCCAAGGTC  
Ae168Ps1\_rpoB GCCCAGGCGCTCCTGGAGAACCTGTTCTTCAAGGACAAGCGCTACGACATGGCCAAGGTC  
Ae263Ps1\_rpoB GCCCAGGCGCTCCTGGAGAACCTGTTCTTCAAGGACAAGCGCTACGACATGGCCAAGGTC  
Ae356Ps1\_rpoB GCCCAGGCGCTCCTGGAGAACCTGTTCTTCAAGGACAAGCGCTACGACATGGCCAAGGTC  
Ae707Ps1\_rpoB GCCCAGGCGCTCCTGGAGAACCTGTTCTTCAAGGACAAGCGCTACGACATGGCCAAGGTC

\*\*\*\*\*

Ae331Ps2\_rpoB GGTGCTACAAGGCCAACAGAAGCTCGGTCTCGACATCGACAACTCGGTCGGCAGCCTG  
Ae505Ps2\_rpoB GGTGCTACAAGGCCAACAGAAGCTCGGTCTCGACATCGACAACTCGGTCGGCAGCCTG  
Ae406Ps2\_rpoB GGTGCTACAAGGCCAACAGAAGCTCGGTCTCGACATCGACAACTCGGTCGGCAGCCTG  
Ae717Ps2\_rpoB GGTGCTACAAGGCCAACAGAAGCTCGGTCTCGACATCGACAACTCGGTCGGCAGCCTG  
Ae706Ps2\_rpoB GGTGCTACAAGGCCAACAGAAGCTCGGTCTCGACATCGACAACTCGGTCGGCAGCCTG  
Ae150APs1\_rpoB GGGCGCTACAAGGCCAACAGAAGCTCGGTCTGGACATCGAGAACTCGGTCGGCAGCCTG  
Ae168Ps1\_rpoB GGGCGCTACAAGGCCAACAGAAGCTCGGTCTGGACATCGAGAACTCGGTCGGCAGCCTG  
Ae263Ps1\_rpoB GGGCGCTACAAGGCCAACAGAAGCTCGGTCTGGACATCGAGAACTCGGTCGGCAGCCTG  
Ae356Ps1\_rpoB GGGCGCTACAAGGCCAACAGAAGCTCGGTCTGGACATCGAGAACTCGGTCGGCAGCCTG  
Ae707Ps1\_rpoB GGGCGCTACAAGGCCAACAGAAGCTCGGTCTGGACATCGAGAACTCGGTCGGCAGCCTG  
\*\* \*\*\*\*\*

Ae331Ps2\_rpoB ACCGAGGAGGATGTCCGCCACCACATCGAGTACCTCGTCCGGCTGCACGCCGCGGAGACC  
Ae505Ps2\_rpoB ACCGAGGAGGATGTCCGCCACCACATCGAGTACCTCGTCCGGCTGCACGCCGCGGAGACC  
Ae406Ps2\_rpoB ACCGAGGAGGATGTCCGCCACCACATCGAGTACCTCGTCCGGCTGCACGCCGCGGAGACC  
Ae717Ps2\_rpoB ACCGAGGAGGATGTCCGCCACCACATCGAGTACCTCGTCCGGCTGCACGCCGCGGAGACC  
Ae706Ps2\_rpoB ACCGAGGAGGATGTCCGCCACCACATCGAGTACCTCGTCCGGCTGCACGCCGCGGAGACC  
Ae150APs1\_rpoB ACCGAGGAGGACGTCCGCCACGACATCGAGTACCTCGTCCGGCTGCACGCCGCGGAGACC  
Ae168Ps1\_rpoB ACCGAGGAGGACGTCCGCCACGACATCGAGTACCTCGTCCGGCTGCACGCCGCGGAGACC  
Ae263Ps1\_rpoB ACCGAGGAGGACGTCCGCCACGACATCGAGTACCTCGTCCGGCTGCACGCCGCGGAGACC  
Ae356Ps1\_rpoB ACCGAGGAGGACGTCCGCCACGACATCGAGTACCTCGTCCGGCTGCACGCCGCGGAGACC  
Ae707Ps1\_rpoB ACCGAGGAGGACGTCCGCCACGACATCGAGTACCTCGTCCGGCTGCACGCCGCGGAGACC  
\*\*\*\*\*

Ae331Ps2\_rpoB ACGATGACCGTGGGTTCGGGTGACTCCGCGGGGAGATCCCGGTGAGACCGACGACATC  
Ae505Ps2\_rpoB ACGATGACCGTGGGTTCGGGTGACTCCGCGGGGAGATCCCGGTGAGACCGACGACATC  
Ae406Ps2\_rpoB ACGATGACCGTGGGTTCGGGTGACTCCGCGGGGAGATCCCGGTGAGACCGACGACATC  
Ae717Ps2\_rpoB ACGATGACCGTGGGTTCGGGTGACTCCGCGGGGAGATCCCGGTGAGACCGACGACATC  
Ae706Ps2\_rpoB ACGATGACCGTGGGTTCGGGTGACTCCGCGGGGAGATCCCGGTGAGACCGACGACATC  
Ae150APs1\_rpoB ACGATGTCGGTGGGCTCCGCGGACTCCGCCGGGAGATCCCGGTGAGACCGACGACATC  
Ae168Ps1\_rpoB ACGATGTCGGTGGGCTCCGCGGACTCCGCCGGGAGATCCCGGTGAGACCGACGACATC  
Ae263Ps1\_rpoB ACGATGTCGGTGGGCTCCGCGGACTCCGCCGGGAGATCCCGGTGAGACCGACGACATC  
Ae356Ps1\_rpoB ACGATGTCGGTGGGCTCCGCGGACTCCGCCGGGAGATCCCGGTGAGACCGACGACATC  
Ae707Ps1\_rpoB ACGATGTCGGTGGGCTCCGCGGACTCCGCCGGGAGATCCCGGTGAGACCGACGACATC  
\*\*\*\*\*

Ae331Ps2\_rpoB GACCACTTCGGCAACCGGCGCTGCGCACCGTCCGGCAGCTGATCCAGAACCAGGTCCGG  
Ae505Ps2\_rpoB GACCACTTCGGCAACCGGCGCTGCGCACCGTCCGGCAGCTGATCCAGAACCAGGTCCGG  
Ae406Ps2\_rpoB GACCACTTCGGCAACCGGCGCTGCGCACCGTCCGGCAGCTGATCCAGAACCAGGTCCGG  
Ae717Ps2\_rpoB GACCACTTCGGCAACCGGCGCTGCGCACCGTCCGGCAGCTGATCCAGAACCAGGTCCGG  
Ae706Ps2\_rpoB GACCACTTCGGCAACCGGCGCTGCGCACCGTCCGGCAGCTGATCCAGAACCAGGTCCGG  
Ae150APs1\_rpoB GACCACTTCGGCAACCGGCGCTGCGCACCGTCCGGCAGCTGATCCAGAACCAGGTCCGG  
Ae168Ps1\_rpoB GACCACTTCGGCAACCGGCGCTGCGCACCGTCCGGCAGCTGATCCAGAACCAGGTCCGG  
Ae263Ps1\_rpoB GACCACTTCGGCAACCGGCGCTGCGCACCGTCCGGCAGCTGATCCAGAACCAGGTCCGG  
Ae356Ps1\_rpoB GACCACTTCGGCAACCGGCGCTGCGCACCGTCCGGCAGCTGATCCAGAACCAGGTCCGG  
Ae707Ps1\_rpoB GACCACTTCGGCAACCGGCGCTGCGCACCGTCCGGCAGCTGATCCAGAACCAGGTCCGG  
\*\*\*\*\*

Ae331Ps2\_rpoB GTCGGTCTGTCCCGCACCAGCGGGTCTCGTCCGCGAGCGGATGACCACCCAGGACGTCGAG  
Ae505Ps2\_rpoB GTCGGTCTGTCCCGCACCAGCGGGTCTCGTCCGCGAGCGGATGACCACCCAGGACGTCGAG  
Ae406Ps2\_rpoB GTCGGTCTGTCCCGCACCAGCGGGTCTCGTCCGCGAGCGGATGACCACCCAGGACGTCGAG  
Ae717Ps2\_rpoB GTCGGTCTGTCCCGCACCAGCGGGTCTCGTCCGCGAGCGGATGACCACCCAGGACGTCGAG  
Ae706Ps2\_rpoB GTCGGTCTGTCCCGCACCAGCGGGTCTCGTCCGCGAGCGGATGACCACCCAGGACGTCGAG  
Ae150APs1\_rpoB GTCGGTCTGTCCCGCACCAGCGGGTCTCGTCCGCGAGCGGATGACCACCCAGGACGTCGAG  
Ae168Ps1\_rpoB GTCGGTCTGTCCCGCACCAGCGGGTCTCGTCCGCGAGCGGATGACCACCCAGGACGTCGAG  
Ae263Ps1\_rpoB GTCGGTCTGTCCCGCACCAGCGGGTCTCGTCCGCGAGCGGATGACCACCCAGGACGTCGAG  
Ae356Ps1\_rpoB GTCGGTCTGTCCCGCACCAGCGGGTCTCGTCCGCGAGCGGATGACCACCCAGGACGTCGAG  
Ae707Ps1\_rpoB GTCGGTCTGTCCCGCACCAGCGGGTCTCGTCCGCGAGCGGATGACCACCCAGGACGTCGAG  
\*\*\*\*\*

Ae331Ps2\_rpoB GCCATCACGCCGAGACCCCTGATCAACACCCGGCCGATCACGGCCGCGATCCGGGAGTTC  
Ae505Ps2\_rpoB GCCATCACGCCGAGACCCCTGATCAACACCCGGCCGATCACGGCCGCGATCCGGGAGTTC  
Ae406Ps2\_rpoB GCCATCACGCCGAGACCCCTGATCAACACCCGGCCGATCACGGCCGCGATCCGGGAGTTC  
Ae717Ps2\_rpoB GCCATCACGCCGAGACCCCTGATCAACACCCGGCCGATCACGGCCGCGATCCGGGAGTTC  
Ae706Ps2\_rpoB GCCATCACGCCGAGACCCCTGATCAACACCCGGCCGATCACGGCCGCGATCCGGGAGTTC  
Ae150APs1\_rpoB GCGATCACGCCGAGACCCCTGATCAACACCCGGCCGATCACGGCCGCGATCCGGGAGTTC  
Ae168Ps1\_rpoB GCGATCACGCCGAGACCCCTGATCAACACCCGGCCGATCACGGCCGCGATCCGGGAGTTC  
Ae263Ps1\_rpoB GCGATCACGCCGAGACCCCTGATCAACACCCGGCCGATCACGGCCGCGATCCGGGAGTTC  
Ae356Ps1\_rpoB GCGATCACGCCGAGACCCCTGATCAACACCCGGCCGATCACGGCCGCGATCCGGGAGTTC  
Ae707Ps1\_rpoB GCGATCACGCCGAGACCCCTGATCAACACCCGGCCGATCACGGCCGCGATCCGGGAGTTC  
\*\* \*\*\*\*\*

Ae331Ps2\_rpoB TTCGGCACCTCGCAGCTGTGCGAGTTCATGGACCAGCACAACCCGCTGGCCGGACTGACC  
Ae505Ps2\_rpoB TTCGGCACCTCGCAGCTGTGCGAGTTCATGGACCAGCACAACCCGCTGGCCGGACTGACC  
Ae406Ps2\_rpoB TTCGGCACCTCGCAGCTGTGCGAGTTCATGGACCAGCACAACCCGCTGGCCGGACTGACC





Ae356Ps1\_rpoB GACGGCTCGTTCCGCCGAGGACCGGGTCCTGGTCCGCCGCAAGGGCGGCGAGGTCGACCTG  
Ae707Ps1\_rpoB GACGGCTCGTTCCGCCGAGGACCGGGTCCTGGTCCGCCGCAAGGGCGGCGAGGTCGACCTG  
\*\*\*\*\* \*\* \*\*\*\*\* \* \* \* \* \* \*\*\*\*\*

Ae331Ps2\_rpoB ATCTCGCCCTCGGGCGTGGAGTACATCGACGTCTCGCCGCGCCAGATGGTGTCCGGTCGCG  
Ae505Ps2\_rpoB ATCTCGCCCTCGGGCGTGGAGTACATCGACGTCTCGCCGCGCCAGATGGTGTCCGGTCGCG  
Ae406Ps2\_rpoB ATCTCGCCCTCGGGCGTGGAGTACATCGACGTCTCGCCGCGCCAGATGGTGTCCGGTCGCG  
Ae717Ps2\_rpoB ATCTCGCCCTCGGGCGTGGAGTACATCGACGTCTCGCCGCGCCAGATGGTGTCCGGTCGCG  
Ae706Ps2\_rpoB ATCTCGCCCTCGGGCGTGGAGTACATCGACGTCTCGCCGCGCCAGATGGTGTCCGGTCGCG  
Ae150APs1\_rpoB ATCTCGCCACCGGGCGTGGAGTACATCGACGTCTCGCCGCGCCAGATGGTGTCCGGTCGCG  
Ae168Ps1\_rpoB ATCTCGCCACCGGGCGTGGAGTACATCGACGTCTCGCCGCGCCAGATGGTGTCCGGTCGCG  
Ae263Ps1\_rpoB ATCTCGCCACCGGGCGTGGAGTACATCGACGTCTCGCCGCGCCAGATGGTGTCCGGTCGCG  
Ae356Ps1\_rpoB ATCTCGCCACCGGGCGTGGAGTACATCGACGTCTCGCCGCGCCAGATGGTGTCCGGTCGCG  
Ae707Ps1\_rpoB ATCTCGCCACCGGGCGTGGAGTACATCGACGTCTCGCCGCGCCAGATGGTGTCCGGTCGCG  
\*\*\*\*\* \* \*\*\*\*\* \*\*\*\*\*

Ae331Ps2\_rpoB ACGGCGATGATCCCGTTCCTCGAGCACGACGACGCGAACC GCGCGCTGATGGGCGCGAAC  
Ae505Ps2\_rpoB ACGGCGATGATCCCGTTCCTCGAGCACGACGACGCGAACC GCGCGCTGATGGGCGCGAAC  
Ae406Ps2\_rpoB ACGGCGATGATCCCGTTCCTCGAGCACGACGACGCGAACC GCGCGCTGATGGGCGCGAAC  
Ae717Ps2\_rpoB ACGGCGATGATCCCGTTCCTCGAGCACGACGACGCGAACC GCGCGCTGATGGGCGCGAAC  
Ae706Ps2\_rpoB ACGGCGATGATCCCGTTCCTCGAGCACGACGACGCGAACC GCGCGCTGATGGGCGCGAAC  
Ae150APs1\_rpoB ACCGCGATGATCCCGTTCCTCGAGCACGACGACGCGAACC GCGGCCCTCATGGGTGCGAAC  
Ae168Ps1\_rpoB ACCGCGATGATCCCGTTCCTCGAGCACGACGACGCGAACC GCGGCCCTCATGGGTGCGAAC  
Ae263Ps1\_rpoB ACCGCGATGATCCCGTTCCTCGAGCACGACGACGCGAACC GCGGCCCTCATGGGTGCGAAC  
Ae356Ps1\_rpoB ACCGCGATGATCCCGTTCCTCGAGCACGACGACGCGAACC GCGGCCCTCATGGGTGCGAAC  
Ae707Ps1\_rpoB ACCGCGATGATCCCGTTCCTCGAGCACGACGACGCGAACC GCGGCCCTCATGGGTGCGAAC  
\*\* \*\*\*\*\* \*\*\*\*\*

Ae331Ps2\_rpoB ATGCAGCGCCAGTCCGTGCCGCTGCTGCGCTCGGAGTCGCGCTGGTCCGGTACCGGCATG  
Ae505Ps2\_rpoB ATGCAGCGCCAGTCCGTGCCGCTGCTGCGCTCGGAGTCGCGCTGGTCCGGTACCGGCATG  
Ae406Ps2\_rpoB ATGCAGCGCCAGTCCGTGCCGCTGCTGCGCTCGGAGTCGCGCTGGTCCGGTACCGGCATG  
Ae717Ps2\_rpoB ATGCAGCGCCAGTCCGTGCCGCTGCTGCGCTCGGAGTCGCGCTGGTCCGGTACCGGCATG  
Ae706Ps2\_rpoB ATGCAGCGCCAGTCCGTGCCGCTGCTGCGCTCGGAGTCGCGCTGGTCCGGTACCGGCATG  
Ae150APs1\_rpoB ATGCAGCGTCAGTCCGTGCCGCTGCTGCGTCCGAGTCGCGCTGGTCCGGCACCGGCATG  
Ae168Ps1\_rpoB ATGCAGCGTCAGTCCGTGCCGCTGCTGCGTCCGAGTCGCGCTGGTCCGGCACCGGCATG  
Ae263Ps1\_rpoB ATGCAGCGTCAGTCCGTGCCGCTGCTGCGTCCGAGTCGCGCTGGTCCGGCACCGGCATG  
Ae356Ps1\_rpoB ATGCAGCGTCAGTCCGTGCCGCTGCTGCGTCCGAGTCGCGCTGGTCCGGCACCGGCATG  
Ae707Ps1\_rpoB ATGCAGCGTCAGTCCGTGCCGCTGCTGCGTCCGAGTCGCGCTGGTCCGGCACCGGCATG  
\*\*\*\*\* \*\*\*\*\*

Ae331Ps2\_rpoB GAGCTGCGTGCCGCCGTCGACGCCGGTGACGTCTGACCCGCCGAGTCCGCCGGTGTGCTC  
Ae505Ps2\_rpoB GAGCTGCGTGCCGCCGTCGACGCCGGTGACGTCTGACCCGCCGAGTCCGCCGGTGTGCTC  
Ae406Ps2\_rpoB GAGCTGCGTGCCGCCGTCGACGCCGGTGACGTCTGACCCGCCGAGTCCGCCGGTGTGCTC  
Ae717Ps2\_rpoB GAGTGCCTGCGCCCGCTCGACGCCGGTGACGTCTGACCCGCCGAGTCCGCCGGTGTGCTC  
Ae706Ps2\_rpoB GAGCTGCGTGCCGCCGTCGACGCCGGTGACGTCTGACCCGCCGAGTCCGCCGGTGTGCTC  
Ae150APs1\_rpoB GAGCTGCGGGCCCGGGTTCGACGCCGGCGACGTCTGCTGGTGGCCGAGCAGGCCGGTGTGGTC  
Ae168Ps1\_rpoB GAGCTGCGGGCCCGGGTTCGACGCCGGCGACGTCTGCTGGTGGCCGAGCAGGCCGGTGTGGTC  
Ae263Ps1\_rpoB GAGCTGCGGGCCCGGGTTCGACGCCGGCGACGTCTGCTGGTGGCCGAGCAGGCCGGTGTGGTC  
Ae356Ps1\_rpoB GAGCTGCGGGCCCGGGTTCGACGCCGGCGACGTCTGCTGGTGGCCGAGCAGGCCGGTGTGGTC  
Ae707Ps1\_rpoB GAGCTGCGGGCCCGGGTTCGACGCCGGCGACGTCTGCTGGTGGCCGAGCAGGCCGGTGTGGTC  
\*\*\*\*\* \*\*\*\*\*

Ae331Ps2\_rpoB GAGGAGCTGTGCGCCGACTACATCACCGTTCATGGACGACGAGGGCCAGCGTCAGACCTAC  
Ae505Ps2\_rpoB GAGGAGCTGTGCGCCGACTACATCACCGTTCATGGACGACGAGGGCCAGCGTCAGACCTAC  
Ae406Ps2\_rpoB GAGGAGCTGTGCGCCGACTACATCACCGTTCATGGACGACGAGGGCCAGCGTCAGACCTAC  
Ae717Ps2\_rpoB GAGGAGCTGTGCGCCGACTACATCACCGTTCATGGACGACGAGGGCCAGCGTCAGACCTAC  
Ae706Ps2\_rpoB GAGGAGCTGTGCGCCGACTACATCACCGTTCATGGACGACGAGGGCCAGCGTCAGACCTAC  
Ae150APs1\_rpoB GAGGAGCTGTGCGCCGACTACATCACCGTTCATGGACGACGAGGGCCAGCGTCAGACCTAC  
Ae168Ps1\_rpoB GAGGAGCTGTGCGCCGACTACATCACCGTTCATGGACGACGAGGGCCAGCGTCAGACCTAC  
Ae263Ps1\_rpoB GAGGAGCTGTGCGCCGACTACATCACCGTTCATGGACGACGAGGGCCAGCGTCAGACCTAC  
Ae356Ps1\_rpoB GAGGAGCTGTGCGCCGACTACATCACCGTTCATGGACGACGAGGGCCAGCGTCAGACCTAC  
Ae707Ps1\_rpoB GAGGAGCTGTGCGCCGACTACATCACCGTTCATGGACGACGAGGGCCAGCGTCAGACCTAC  
\*\*\*\*\* \*\*\*\*\*

Ae331Ps2\_rpoB CGTCTGAACAAGTTCCGCCGCTCGAACCAGGGCACCTGCAACAACCAGAAGCCCATCGTC  
Ae505Ps2\_rpoB CGTCTGAACAAGTTCCGCCGCTCGAACCAGGGCACCTGCAACAACCAGAAGCCCATCGTC  
Ae406Ps2\_rpoB CGTCTGAACAAGTTCCGCCGCTCGAACCAGGGCACCTGCAACAACCAGAAGCCCATCGTC  
Ae717Ps2\_rpoB CGTCTGAACAAGTTCCGCCGCTCGAACCAGGGCACCTGCAACAACCAGAAGCCCATCGTC  
Ae706Ps2\_rpoB CGTCTGAACAAGTTCCGCCGCTCGAACCAGGGCACCTGCAACAACCAGAAGCCCATCGTC  
Ae150APs1\_rpoB CGTCTGAACAAGTTCCGCCGCTCGAACCAGGGCACCTGCAACAACCAGAAGCCCATCGTC  
Ae168Ps1\_rpoB CGTCTGAACAAGTTCCGCCGCTCGAACCAGGGCACCTGCAACAACCAGAAGCCCATCGTC  
Ae263Ps1\_rpoB CGTCTGAACAAGTTCCGCCGCTCGAACCAGGGCACCTGCAACAACCAGAAGCCCATCGTC  
Ae356Ps1\_rpoB CGTCTGAACAAGTTCCGCCGCTCGAACCAGGGCACCTGCAACAACCAGAAGCCCATCGTC  
Ae707Ps1\_rpoB CGTCTGAACAAGTTCCGCCGCTCGAACCAGGGCACCTGCAACAACCAGAAGCCCATCGTC  
\*\*\*\*\* \*\*\*\*\*

Ae331Ps2\_rpoB GACGAGGGGCGAGCGGGTTCGAGGTGGGCCAGGTGCTCGCCGACGGTCCCTGCACCGAGAAC

Ae505Ps2\_rpoB GACGAGGGGCAGCGGGTCGAGGTGGGCCAGGTGCTCGCCGACGGTCCCTGCACCCGAGAAC  
Ae406Ps2\_rpoB GACGAGGGGCAGCGGGTCGAGGTGGGCCAGGTGCTCGCCGACGGTCCCTGCACCCGAGAAC  
Ae717Ps2\_rpoB GACGAGGGGCAGCGGGTCGAGGTGGGCCAGGTGCTCGCCGACGGTCCCTGCACCCGAGAAC  
Ae706Ps2\_rpoB GACGAGGGGCAGCGGGTCGAGGTGGGCCAGGTGCTCGCCGACGGTCCCTGCACCCGAGAAC  
Ae150APs1\_rpoB GACGAGGGGCATGCGGGTCGAGGTGGGCCAGGTGCTCGCCGACGGACCGTGCACCCGAGAAC  
Ae168Ps1\_rpoB GACGAGGGGCATGCGGGTCGAGGTGGGCCAGGTGCTCGCCGACGGACCGTGCACCCGAGAAC  
Ae263Ps1\_rpoB GACGAGGGGCATGCGGGTCGAGGTGGGCCAGGTGCTCGCCGACGGACCGTGCACCCGAGAAC  
Ae356Ps1\_rpoB GACGAGGGGCATGCGGGTCGAGGTGGGCCAGGTGCTCGCCGACGGACCGTGCACCCGAGAAC  
Ae707Ps1\_rpoB GACGAGGGGCATGCGGGTCGAGGTGGGCCAGGTGCTCGCCGACGGACCGTGCACCCGAGAAC  
\*\*\*\*\*

Ae331Ps2\_rpoB GGTGAGATGGCGCTGGGCAAGAACCTGCTCGTGGCGATCATGCCGTGGGAGGGCCACAAC  
Ae505Ps2\_rpoB GGTGAGATGGCGCTGGGCAAGAACCTGCTCGTGGCGATCATGCCGTGGGAGGGCCACAAC  
Ae406Ps2\_rpoB GGTGAGATGGCGCTGGGCAAGAACCTGCTCGTGGCGATCATGCCGTGGGAGGGCCACAAC  
Ae717Ps2\_rpoB GGTGAGATGGCGCTGGGCAAGAACCTGCTCGTGGCGATCATGCCGTGGGAGGGCCACAAC  
Ae706Ps2\_rpoB GGTGAGATGGCGCTGGGCAAGAACCTGCTCGTGGCGATCATGCCGTGGGAGGGCCACAAC  
Ae150APs1\_rpoB GGCAGATGGCGCTGGGCAAGAACCTCCTCGTGGCGATCATGCCGTGGGAGGGCCACAAC  
Ae168Ps1\_rpoB GGCAGATGGCGCTGGGCAAGAACCTCCTCGTGGCGATCATGCCGTGGGAGGGCCACAAC  
Ae263Ps1\_rpoB GGCAGATGGCGCTGGGCAAGAACCTCCTCGTGGCGATCATGCCGTGGGAGGGCCACAAC  
Ae356Ps1\_rpoB GGCAGATGGCGCTGGGCAAGAACCTCCTCGTGGCGATCATGCCGTGGGAGGGCCACAAC  
Ae707Ps1\_rpoB GGCAGATGGCGCTGGGCAAGAACCTCCTCGTGGCGATCATGCCGTGGGAGGGCCACAAC  
\*\*

Ae331Ps2\_rpoB TACGAGGACGCGATCATCCTGTGCGAGCGCCTCGTGCAGGACGACGTGCTCACCTCGATC  
Ae505Ps2\_rpoB TACGAGGACGCGATCATCCTGTGCGAGCGCCTCGTGCAGGACGACGTGCTCACCTCGATC  
Ae406Ps2\_rpoB TACGAGGACGCGATCATCCTGTGCGAGCGCCTCGTGCAGGACGACGTGCTCACCTCGATC  
Ae717Ps2\_rpoB TACGAGGACGCGATCATCCTGTGCGAGCGCCTCGTGCAGGACGACGTGCTCACCTCGATC  
Ae706Ps2\_rpoB TACGAGGACGCGATCATCCTGTGCGAGCGCCTCGTGCAGGACGACGTGCTCACCTCGATC  
Ae150APs1\_rpoB TACGAGGACGCGATCATCCTGTGCGAGCGCCTCGTCCAGGACGACGTGCTCACCTCGATC  
Ae168Ps1\_rpoB TACGAGGACGCGATCATCCTGTGCGAGCGCCTCGTCCAGGACGACGTGCTCACCTCGATC  
Ae263Ps1\_rpoB TACGAGGACGCGATCATCCTGTGCGAGCGCCTCGTCCAGGACGACGTGCTCACCTCGATC  
Ae356Ps1\_rpoB TACGAGGACGCGATCATCCTGTGCGAGCGCCTCGTCCAGGACGACGTGCTCACCTCGATC  
Ae707Ps1\_rpoB TACGAGGACGCGATCATCCTGTGCGAGCGCCTCGTCCAGGACGACGTGCTCACCTCGATC  
\*\*\*\*\*

Ae331Ps2\_rpoB CACATCGAGGAGCAGAGATCGACGCGCGGACACGAAGCTGGGCGCCGAGGAGATCACC  
Ae505Ps2\_rpoB CACATCGAGGAGCAGAGATCGACGCGCGGACACGAAGCTGGGCGCCGAGGAGATCACC  
Ae406Ps2\_rpoB CACATCGAGGAGCAGAGATCGACGCGCGGACACGAAGCTGGGCGCCGAGGAGATCACC  
Ae717Ps2\_rpoB CACATCGAGGAGCAGAGATCGACGCGCGGACACGAAGCTGGGCGCCGAGGAGATCACC  
Ae706Ps2\_rpoB CACATCGAGGAGCAGAGATCGACGCGCGGACACGAAGCTGGGCGCCGAGGAGATCACC  
Ae150APs1\_rpoB CACATCGAGGAGCAGAGATCGACGCGCGGACACGAAGCTGGGCGCCGAGGAGATCACC  
Ae168Ps1\_rpoB CACATCGAGGAGCAGAGATCGACGCGCGGACACGAAGCTGGGCGCCGAGGAGATCACC  
Ae263Ps1\_rpoB CACATCGAGGAGCAGAGATCGACGCGCGGACACGAAGCTGGGCGCCGAGGAGATCACC  
Ae356Ps1\_rpoB CACATCGAGGAGCAGAGATCGACGCGCGGACACGAAGCTGGGCGCCGAGGAGATCACC  
Ae707Ps1\_rpoB CACATCGAGGAGCAGAGATCGACGCGCGGACACGAAGCTGGGCGCCGAGGAGATCACC  
\*\*\*\*\*

Ae331Ps2\_rpoB CGGGACATCCCGAACGTCTCCGAGGACGTGCTGGCCGACCTCGACGAGCGCGGCATCATC  
Ae505Ps2\_rpoB CGGGACATCCCGAACGTCTCCGAGGACGTGCTGGCCGACCTCGACGAGCGCGGCATCATC  
Ae406Ps2\_rpoB CGGGACATCCCGAACGTCTCCGAGGACGTGCTGGCCGACCTCGACGAGCGCGGCATCATC  
Ae717Ps2\_rpoB CGGGACATCCCGAACGTCTCCGAGGACGTGCTGGCCGACCTCGACGAGCGCGGCATCATC  
Ae706Ps2\_rpoB CGGGACATCCCGAACGTCTCCGAGGACGTGCTGGCCGACCTCGACGAGCGCGGCATCATC  
Ae150APs1\_rpoB CGGGACATCCCGAACGTCTCCGAGGACGTGCTGGCCGACCTCGACGAGCGCGGCATCATC  
Ae168Ps1\_rpoB CGGGACATCCCGAACGTCTCCGAGGACGTGCTGGCCGACCTCGACGAGCGCGGCATCATC  
Ae263Ps1\_rpoB CGGGACATCCCGAACGTCTCCGAGGACGTGCTGGCCGACCTCGACGAGCGCGGCATCATC  
Ae356Ps1\_rpoB CGGGACATCCCGAACGTCTCCGAGGACGTGCTGGCCGACCTCGACGAGCGCGGCATCATC  
Ae707Ps1\_rpoB CGGGACATCCCGAACGTCTCCGAGGACGTGCTGGCCGACCTCGACGAGCGCGGCATCATC  
\*\*\*\*\*

Ae331Ps2\_rpoB CGGATCGGCGCCGAGGTCCAGCCCGGCGACATCCTGGTCCGCAAGGTCACGCCAAGGGC  
Ae505Ps2\_rpoB CGGATCGGCGCCGAGGTCCAGCCCGGCGACATCCTGGTCCGCAAGGTCACGCCAAGGGC  
Ae406Ps2\_rpoB CGGATCGGCGCCGAGGTCCAGCCCGGCGACATCCTGGTCCGCAAGGTCACGCCAAGGGC  
Ae717Ps2\_rpoB CGGATCGGCGCCGAGGTCCAGCCCGGCGACATCCTGGTCCGCAAGGTCACGCCAAGGGC  
Ae706Ps2\_rpoB CGGATCGGCGCCGAGGTCCAGCCCGGCGACATCCTGGTCCGCAAGGTCACGCCAAGGGC  
Ae150APs1\_rpoB CGGATCGGTCGCCGAGGTCCAGCCCGGCGACATCCTGGTCCGCAAGGTCACGCCAAGGGC  
Ae168Ps1\_rpoB CGGATCGGTCGCCGAGGTCCAGCCCGGCGACATCCTGGTCCGCAAGGTCACGCCAAGGGC  
Ae263Ps1\_rpoB CGGATCGGTCGCCGAGGTCCAGCCCGGCGACATCCTGGTCCGCAAGGTCACGCCAAGGGC  
Ae356Ps1\_rpoB CGGATCGGTCGCCGAGGTCCAGCCCGGCGACATCCTGGTCCGCAAGGTCACGCCAAGGGC  
Ae707Ps1\_rpoB CGGATCGGTCGCCGAGGTCCAGCCCGGCGACATCCTGGTCCGCAAGGTCACGCCAAGGGC  
\*\*\*\*\*

Ae331Ps2\_rpoB GAGACCGAGCTGACCCGGAGGAGCGCCTGCTCCGCGCATCTTCGGTGAGAAGGCGCGC  
Ae505Ps2\_rpoB GAGACCGAGCTGACCCGGAGGAGCGCCTGCTCCGCGCATCTTCGGTGAGAAGGCGCGC  
Ae406Ps2\_rpoB GAGACCGAGCTGACCCGGAGGAGCGCCTGCTCCGCGCATCTTCGGTGAGAAGGCGCGC  
Ae717Ps2\_rpoB GAGACCGAGCTGACCCGGAGGAGCGCCTGCTCCGCGCATCTTCGGTGAGAAGGCGCGC  
Ae706Ps2\_rpoB GAGACCGAGCTGACCCGGAGGAGCGCCTGCTCCGCGCATCTTCGGTGAGAAGGCGCGC  
Ae150APs1\_rpoB GAGACCGAGCTGACCCGGAGGAGCGCCTGCTCCGCGCATCTTCGGTGAGAAGGCGCGC



Ae331Ps2\_rpoB GAGTGGGCGGCGCAGATGCCCGAGGAGCTCTACTCGGTGCCCGCCGACACGAACACCGCGG  
Ae505Ps2\_rpoB GAGTGGGCGGCGCAGATGCCCGAGGAGCTCTACTCGGTGCCCGCCGACACGAACACCGCGG  
Ae406Ps2\_rpoB GAGTGGGCGGCGCAGATGCCCGAGGAGCTCTACTCGGTGCCCGCCGACACGAACACCGCGG  
Ae717Ps2\_rpoB GAGTGGGCGGCGCAGATGCCCGAGGAGCTCTACTCGGTGCCCGCCGACACGAACACCGCGG  
Ae706Ps2\_rpoB GAGTGGGCGGCGCAGATGCCCGAGGAGCTCTACTCGGTGCCCGCCGACACGAACACCGCGG  
Ae150APs1\_rpoB GAATGGGCGTCCCGGATGCCCGAGGAGCTCTACTCGGTGCCCGCCGACACGAAGACCGCGG  
Ae168Ps1\_rpoB GAATGGGCGTCCCGGATGCCCGAGGAGCTCTACTCGGTGCCCGCCGACACGAAGACCGCGG  
Ae263Ps1\_rpoB GAATGGGCGTCCCGGATGCCCGAGGAGCTCTACTCGGTGCCCGCCGACACGAAGACCGCGG  
Ae356Ps1\_rpoB GAATGGGCGTCCCGGATGCCCGAGGAGCTCTACTCGGTGCCCGCCGACACGAAGACCGCGG  
Ae707Ps1\_rpoB GAATGGGCGTCCCGGATGCCCGAGGAGCTCTACTCGGTGCCCGCCGACACGAAGACCGCGG  
\*\* \* \* \* \* \*

Ae331Ps2\_rpoB ACGCCGGTGTTCGACGGTGC CGCGGAGCAGAGATCACGGGTCTGCTCGGCTCGACCCGC  
Ae505Ps2\_rpoB ACGCCGGTGTTCGACGGTGC CGCGGAGCAGAGATCACGGGTCTGCTCGGCTCGACCCGC  
Ae406Ps2\_rpoB ACGCCGGTGTTCGACGGTGC CGCGGAGCAGAGATCACGGGTCTGCTCGGCTCGACCCGC  
Ae717Ps2\_rpoB ACGCCGGTGTTCGACGGTGC CGCGGAGCAGAGATCACGGGTCTGCTCGGCTCGACCCGC  
Ae706Ps2\_rpoB ACGCCGGTGTTCGACGGTGC CGCGGAGCAGAGATCACGGGTCTGCTCGGCTCGACCCGC  
Ae150APs1\_rpoB ACGCCGGTGTTCGACGGTGC CGCGGAGCAGAGATCACGGGTCTGCTCGGCTCGACCCGC  
Ae168Ps1\_rpoB ACGCCGGTGTTCGACGGTGC CGCGGAGCAGAGATCACGGGTCTGCTCGGCTCGACCCGC  
Ae263Ps1\_rpoB ACGCCGGTGTTCGACGGTGC CGCGGAGCAGAGATCACGGGTCTGCTCGGCTCGACCCGC  
Ae356Ps1\_rpoB ACGCCGGTGTTCGACGGTGC CGCGGAGCAGAGATCACGGGTCTGCTCGGCTCGACCCGC  
Ae707Ps1\_rpoB ACGCCGGTGTTCGACGGTGC CGCGGAGCAGAGATCACGGGTCTGCTCGGCTCGACCCGC  
\* \* \* \* \*

Ae331Ps2\_rpoB CCCAACCGGGACGGCGAGCGGATGGTCCGGTCCGGACGGCAAGGGCGAGCTGCTCGACGGC  
Ae505Ps2\_rpoB CCCAACCGGGACGGCGAGCGGATGGTCCGGTCCGGACGGCAAGGGCGAGCTGCTCGACGGC  
Ae406Ps2\_rpoB CCCAACCGGGACGGCGAGCGGATGGTCCGGTCCGGACGGCAAGGGCGAGCTGCTCGACGGC  
Ae717Ps2\_rpoB CCCAACCGGGACGGCGAGCGGATGGTCCGGTCCGGACGGCAAGGGCGAGCTGCTCGACGGC  
Ae706Ps2\_rpoB CCCAACCGGGACGGCGAGCGGATGGTCCGGTCCGGACGGCAAGGGCGAGCTGCTCGACGGC  
Ae150APs1\_rpoB CCGAACCCGCGACGGTGAGCGGATGGTGCAGCCGGACGGCAAGGGCGAGCTGCTCGACGGG  
Ae168Ps1\_rpoB CCGAACCCGCGACGGTGAGCGGATGGTGCAGCCGGACGGCAAGGGCGAGCTGCTCGACGGG  
Ae263Ps1\_rpoB CCGAACCCGCGACGGTGAGCGGATGGTGCAGCCGGACGGCAAGGGCGAGCTGCTCGACGGG  
Ae356Ps1\_rpoB CCGAACCCGCGACGGTGAGCGGATGGTGCAGCCGGACGGCAAGGGCGAGCTGCTCGACGGG  
Ae707Ps1\_rpoB CCGAACCCGCGACGGTGAGCGGATGGTGCAGCCGGACGGCAAGGGCGAGCTGCTCGACGGG  
\* \* \* \* \*

Ae331Ps2\_rpoB CGCTCCGGTGGAGCCGTACCCGTTCCCGGTCGCGGTCGGGTACATGTACATCCTGAAGCTG  
Ae505Ps2\_rpoB CGCTCCGGTGGAGCCGTACCCGTTCCCGGTCGCGGTCGGGTACATGTACATCCTGAAGCTG  
Ae406Ps2\_rpoB CGCTCCGGTGGAGCCGTACCCGTTCCCGGTCGCGGTCGGGTACATGTACATCCTGAAGCTG  
Ae717Ps2\_rpoB CGCTCCGGTGGAGCCGTACCCGTTCCCGGTCGCGGTCGGGTACATGTACATCCTGAAGCTG  
Ae706Ps2\_rpoB CGCTCCGGTGGAGCCGTACCCGTTCCCGGTCGCGGTCGGGTACATGTACATCCTGAAGCTG  
Ae150APs1\_rpoB CGCTCCGGTGGAGCCGTACCCGTTCCCGGTCGCGGTCGGGTACATGTACATCCTGAAGCTG  
Ae168Ps1\_rpoB CGCTCCGGTGGAGCCGTACCCGTTCCCGGTCGCGGTCGGGTACATGTACATCCTGAAGCTG  
Ae263Ps1\_rpoB CGCTCCGGTGGAGCCGTACCCGTTCCCGGTCGCGGTCGGGTACATGTACATCCTGAAGCTG  
Ae356Ps1\_rpoB CGCTCCGGTGGAGCCGTACCCGTTCCCGGTCGCGGTCGGGTACATGTACATCCTGAAGCTG  
Ae707Ps1\_rpoB CGCTCCGGTGGAGCCGTACCCGTTCCCGGTCGCGGTCGGGTACATGTACATCCTGAAGCTG  
\* \* \* \* \*

Ae331Ps2\_rpoB GCCCACCTGGTGGACGACAAGATCCACGCCGGTTCGACCGGCCCTACTCGATGATCACC  
Ae505Ps2\_rpoB GCCCACCTGGTGGACGACAAGATCCACGCCGGTTCGACCGGCCCTACTCGATGATCACC  
Ae406Ps2\_rpoB GCCCACCTGGTGGACGACAAGATCCACGCCGGTTCGACCGGCCCTACTCGATGATCACC  
Ae717Ps2\_rpoB GCCCACCTGGTGGACGACAAGATCCACGCCGGTTCGACCGGCCCTACTCGATGATCACC  
Ae706Ps2\_rpoB GCCCACCTGGTGGACGACAAGATCCACGCCGGTTCGACCGGCCCTACTCGATGATCACC  
Ae150APs1\_rpoB GCGCACCTGGTGGACGACAAGATCCACGCCGGTTCGACCGGCCCTACTCGATGATCACC  
Ae168Ps1\_rpoB GCGCACCTGGTGGACGACAAGATCCACGCCGGTTCGACCGGCCCTACTCGATGATCACC  
Ae263Ps1\_rpoB GCGCACCTGGTGGACGACAAGATCCACGCCGGTTCGACCGGCCCTACTCGATGATCACC  
Ae356Ps1\_rpoB GCGCACCTGGTGGACGACAAGATCCACGCCGGTTCGACCGGCCCTACTCGATGATCACC  
Ae707Ps1\_rpoB GCGCACCTGGTGGACGACAAGATCCACGCCGGTTCGACCGGCCCTACTCGATGATCACC  
\* \* \* \* \*

Ae331Ps2\_rpoB CAGCAGCCGCTGGGCGGTAAGGCGCAGTTCGGTGGCCAGCGCTTCGGCGAGATGGAGTGC  
Ae505Ps2\_rpoB CAGCAGCCGCTGGGCGGTAAGGCGCAGTTCGGTGGCCAGCGCTTCGGCGAGATGGAGTGC  
Ae406Ps2\_rpoB CAGCAGCCGCTGGGCGGTAAGGCGCAGTTCGGTGGCCAGCGCTTCGGCGAGATGGAGTGC  
Ae717Ps2\_rpoB CAGCAGCCGCTGGGCGGTAAGGCGCAGTTCGGTGGCCAGCGCTTCGGCGAGATGGAGTGC  
Ae706Ps2\_rpoB CAGCAGCCGCTGGGCGGTAAGGCGCAGTTCGGTGGCCAGCGCTTCGGCGAGATGGAGTGC  
Ae150APs1\_rpoB CAGCAGCCGCTGGGCGGTAAGGCGCAGTTCGGTGGTTCAGCGCTTCGGTGGAGATGGAGTGC  
Ae168Ps1\_rpoB CAGCAGCCGCTGGGCGGTAAGGCGCAGTTCGGTGGTTCAGCGCTTCGGTGGAGATGGAGTGC  
Ae263Ps1\_rpoB CAGCAGCCGCTGGGCGGTAAGGCGCAGTTCGGTGGTTCAGCGCTTCGGTGGAGATGGAGTGC  
Ae356Ps1\_rpoB CAGCAGCCGCTGGGCGGTAAGGCGCAGTTCGGTGGTTCAGCGCTTCGGTGGAGATGGAGTGC  
Ae707Ps1\_rpoB CAGCAGCCGCTGGGCGGTAAGGCGCAGTTCGGTGGTTCAGCGCTTCGGTGGAGATGGAGTGC  
\* \* \* \* \*

Ae331Ps2\_rpoB TGGGCGATGCAGGCGTACGGCGCGGCTACACCCCTGCAGGAGCTGCTGACGATCAAGTCC  
Ae505Ps2\_rpoB TGGGCGATGCAGGCGTACGGCGCGGCTACACCCCTGCAGGAGCTGCTGACGATCAAGTCC  
Ae406Ps2\_rpoB TGGGCGATGCAGGCGTACGGCGCGGCTACACCCCTGCAGGAGCTGCTGACGATCAAGTCC  
Ae717Ps2\_rpoB TGGGCGATGCAGGCGTACGGCGCGGCTACACCCCTGCAGGAGCTGCTGACGATCAAGTCC

Ae706Ps2\_rpoB TGGGCGATGCAGGCGTACGGCGCGGCCACACCCCTGCAGGAGCTGCTGACGATCAAGTCC  
Ae150APs1\_rpoB TGGGCGATGCAGGCGTACGGCGCGGCCACACCCCTGCAGGAGCTGCTGACGATCAAGTCC  
Ae168Ps1\_rpoB TGGGCGATGCAGGCGTACGGCGCGGCCACACCCCTGCAGGAGCTGCTGACGATCAAGTCC  
Ae263Ps1\_rpoB TGGGCGATGCAGGCGTACGGCGCGGCCACACCCCTGCAGGAGCTGCTGACGATCAAGTCC  
Ae356Ps1\_rpoB TGGGCGATGCAGGCGTACGGCGCGGCCACACCCCTGCAGGAGCTGCTGACGATCAAGTCC  
Ae707Ps1\_rpoB TGGGCGATGCAGGCGTACGGCGCGGCCACACCCCTGCAGGAGCTGCTGACGATCAAGTCC  
\*\*\*\*\*

Ae331Ps2\_rpoB GACGACGTCGTGGGCGCGTGAAGGTCTACGAGGCGATCGTCAAGGGCGAGAACATCCCG  
Ae505Ps2\_rpoB GACGACGTCGTGGGCGCGTGAAGGTCTACGAGGCGATCGTCAAGGGCGAGAACATCCCG  
Ae406Ps2\_rpoB GACGACGTCGTGGGCGCGTGAAGGTCTACGAGGCGATCGTCAAGGGCGAGAACATCCCG  
Ae717Ps2\_rpoB GACGACGTCGTGGGCGCGTGAAGGTCTACGAGGCGATCGTCAAGGGCGAGAACATCCCG  
Ae706Ps2\_rpoB GACGACGTCGTGGGCGCGTGAAGGTCTACGAGGCGATCGTCAAGGGCGAGAACATCCCG  
Ae150APs1\_rpoB GACGACGTCGTGGGCGCGTGAAGGTCTACGAGGCGATCGTCAAGGGCGAGAACATCCCG  
Ae168Ps1\_rpoB GACGACGTCGTGGGCGCGTGAAGGTCTACGAGGCGATCGTCAAGGGCGAGAACATCCCG  
Ae263Ps1\_rpoB GACGACGTCGTGGGCGCGTGAAGGTCTACGAGGCGATCGTCAAGGGCGAGAACATCCCG  
Ae356Ps1\_rpoB GACGACGTCGTGGGCGCGTGAAGGTCTACGAGGCGATCGTCAAGGGCGAGAACATCCCG  
Ae707Ps1\_rpoB GACGACGTCGTGGGCGCGTGAAGGTCTACGAGGCGATCGTCAAGGGCGAGAACATCCCG  
\*\*\*\*\*

Ae331Ps2\_rpoB GAGCCGGGGATCCCCGAGTCGTTCAAGGTGCTCCTCAAGGAGCTGCAGTCGCTCTGCCTG  
Ae505Ps2\_rpoB GAGCCGGGGATCCCCGAGTCGTTCAAGGTGCTCCTCAAGGAGCTGCAGTCGCTCTGCCTG  
Ae406Ps2\_rpoB GAGCCGGGGATCCCCGAGTCGTTCAAGGTGCTCCTCAAGGAGCTGCAGTCGCTCTGCCTG  
Ae717Ps2\_rpoB GAGCCGGGGATCCCCGAGTCGTTCAAGGTGCTCCTCAAGGAGCTGCAGTCGCTCTGCCTG  
Ae706Ps2\_rpoB GAGCCGGGGATCCCCGAGTCGTTCAAGGTGCTCCTCAAGGAGCTGCAGTCGCTCTGCCTG  
Ae150APs1\_rpoB GAGCCGGGGATCCCCGAGTCGTTCAAGGTGCTCCTCAAGGAGCTGCAGTCGCTCTGCCTG  
Ae168Ps1\_rpoB GAGCCGGGGATCCCCGAGTCGTTCAAGGTGCTCCTCAAGGAGCTGCAGTCGCTCTGCCTG  
Ae263Ps1\_rpoB GAGCCGGGGATCCCCGAGTCGTTCAAGGTGCTCCTCAAGGAGCTGCAGTCGCTCTGCCTG  
Ae356Ps1\_rpoB GAGCCGGGGATCCCCGAGTCGTTCAAGGTGCTCCTCAAGGAGCTGCAGTCGCTCTGCCTG  
Ae707Ps1\_rpoB GAGCCGGGGATCCCCGAGTCGTTCAAGGTGCTCCTCAAGGAGCTGCAGTCGCTCTGCCTG  
\*\*\*\*\*

Ae331Ps2\_rpoB AACGTCGAGGTGCTCTCCAGCGACGGTGC GGCGATCGAGATGCGGGACGCCGACGACGAA  
Ae505Ps2\_rpoB AACGTCGAGGTGCTCTCCAGCGACGGTGC GGCGATCGAGATGCGGGACGCCGACGACGAA  
Ae406Ps2\_rpoB AACGTCGAGGTGCTCTCCAGCGACGGTGC GGCGATCGAGATGCGGGACGCCGACGACGAA  
Ae717Ps2\_rpoB AACGTCGAGGTGCTCTCCAGCGACGGTGC GGCGATCGAGATGCGGGACGCCGACGACGAA  
Ae706Ps2\_rpoB AACGTCGAGGTGCTCTCCAGCGACGGTGC GGCGATCGAGATGCGGGACGCCGACGACGAA  
Ae150APs1\_rpoB AACGTCGAGGTGCTCTCCAGCGACGGTGC GGCGATCGAGATGCGGGACGCCGACGACGAA  
Ae168Ps1\_rpoB AACGTCGAGGTGCTCTCCAGCGACGGTGC GGCGATCGAGATGCGGGACGCCGACGACGAA  
Ae263Ps1\_rpoB AACGTCGAGGTGCTCTCCAGCGACGGTGC GGCGATCGAGATGCGGGACGCCGACGACGAA  
Ae356Ps1\_rpoB AACGTCGAGGTGCTCTCCAGCGACGGTGC GGCGATCGAGATGCGGGACGCCGACGACGAA  
Ae707Ps1\_rpoB AACGTCGAGGTGCTCTCCAGCGACGGTGC GGCGATCGAGATGCGGGACGCCGACGACGAA  
\*\*\*\*\*

Ae331Ps2\_rpoB GACCTCGAGCGTGC CGCGCGAATCTGGGCATCAACCTGTCCAGCCGCCGGGCTCGGAG  
Ae505Ps2\_rpoB GACCTCGAGCGTGC CGCGCGAATCTGGGCATCAACCTGTCCAGCCGCCGGGCTCGGAG  
Ae406Ps2\_rpoB GACCTCGAGCGTGC CGCGCGAATCTGGGCATCAACCTGTCCAGCCGCCGGGCTCGGAG  
Ae717Ps2\_rpoB GACCTCGAGCGTGC CGCGCGAATCTGGGCATCAACCTGTCCAGCCGCCGGGCTCGGAG  
Ae706Ps2\_rpoB GACCTCGAGCGTGC CGCGCGAATCTGGGCATCAACCTGTCCAGCCGCCGGGCTCGGAG  
Ae150APs1\_rpoB GACCTCGAGCGTGC CGCGCGAATCTGGGCATCAACCTGTCCAGCCGCCGGGCTCGGAG  
Ae168Ps1\_rpoB GACCTCGAGCGTGC CGCGCGAATCTGGGCATCAACCTGTCCAGCCGCCGGGCTCGGAG  
Ae263Ps1\_rpoB GACCTCGAGCGTGC CGCGCGAATCTGGGCATCAACCTGTCCAGCCGCCGGGCTCGGAG  
Ae356Ps1\_rpoB GACCTCGAGCGTGC CGCGCGAATCTGGGCATCAACCTGTCCAGCCGCCGGGCTCGGAG  
Ae707Ps1\_rpoB GACCTCGAGCGTGC CGCGCGAATCTGGGCATCAACCTGTCCAGCCGCCGGGCTCGGAG  
\*\*\*\*\*

Ae331Ps2\_rpoB TCGATGACCGTTCGACGACGTCGTC AACTGA  
Ae505Ps2\_rpoB TCGATGACCGTTCGACGACGTCGTC AACTGA  
Ae406Ps2\_rpoB TCGATGACCGTTCGACGACGTCGTC AACTGA  
Ae717Ps2\_rpoB TCGATGACCGTTCGACGACGTCGTC AACTGA  
Ae706Ps2\_rpoB TCGATGACCGTTCGACGACGTCGTC AACTGA  
Ae150APs1\_rpoB TCGATGACCGTTCGACGACGTCGTC AACTGA  
Ae168Ps1\_rpoB TCGATGACCGTTCGACGACGTCGTC AACTGA  
Ae263Ps1\_rpoB TCGATGACCGTTCGACGACGTCGTC AACTGA  
Ae356Ps1\_rpoB TCGATGACCGTTCGACGACGTCGTC AACTGA  
Ae707Ps1\_rpoB TCGATGACCGTTCGACGACGTCGTC AACTGA  
\*\*\*\*\*

**Supplementary Table 4. *rpoB* gene percentage identity across *Pseudonocardia* strains.**

|                                  | <b>Ae150<br/>A_Ps1<br/>_rpoB</b> | <b>Ae168<br/>_Ps1_<br/>rpoB</b> | <b>Ae263<br/>_Ps1_<br/>rpoB</b> | <b>Ae356<br/>_Ps1_<br/>rpoB</b> | <b>Ae707<br/>_Ps1_<br/>rpoB</b> | <b>Ae331<br/>_Ps2_<br/>rpoB</b> | <b>Ae406<br/>_Ps2_<br/>rpoB</b> | <b>Ae505<br/>_Ps2_<br/>rpoB</b> | <b>Ae706<br/>_Ps2_<br/>rpoB</b> | <b>Ae717<br/>_Ps2_<br/>rpoB</b> |
|----------------------------------|----------------------------------|---------------------------------|---------------------------------|---------------------------------|---------------------------------|---------------------------------|---------------------------------|---------------------------------|---------------------------------|---------------------------------|
| <b>Ae150<br/>A_Ps1<br/>_rpoB</b> | 100                              | 100                             | 100                             | 100                             | 99.74                           | 95.01                           | 95.01                           | 94.96                           | 94.99                           | 95.01                           |
| <b>Ae168<br/>Ps1_rp<br/>oB</b>   | 100                              | 100                             | 100                             | 100                             | 99.74                           | 95.01                           | 95.01                           | 94.96                           | 94.99                           | 95.01                           |
| <b>Ae263<br/>_Ps1_r<br/>poB</b>  | 100                              | 100                             | 100                             | 100                             | 99.74                           | 95.01                           | 95.01                           | 94.96                           | 94.99                           | 95.01                           |
| <b>Ae356<br/>Ps1_rp<br/>oB</b>   | 100                              | 100                             | 100                             | 100                             | 99.74                           | 95.01                           | 95.01                           | 94.96                           | 94.99                           | 95.01                           |
| <b>Ae707<br/>_Ps1_r<br/>poB</b>  | 99.74                            | 99.74                           | 99.74                           | 99.74                           | 100                             | 95.1                            | 95.1                            | 95.04                           | 95.07                           | 95.1                            |
| <b>Ae331<br/>_Ps2_r<br/>poB</b>  | 95.01                            | 95.01                           | 95.01                           | 95.01                           | 95.1                            | 100                             | 100                             | 99.94                           | 99.97                           | 100                             |
| <b>Ae406<br/>_Ps2_r<br/>poB</b>  | 95.01                            | 95.01                           | 95.01                           | 95.01                           | 95.1                            | 100                             | 100                             | 99.94                           | 99.97                           | 100                             |
| <b>Ae505<br/>_Ps2_r<br/>poB</b>  | 94.96                            | 94.96                           | 94.96                           | 94.96                           | 95.04                           | 99.94                           | 99.94                           | 100                             | 99.91                           | 99.94                           |
| <b>Ae706<br/>_Ps2_r<br/>poB</b>  | 94.99                            | 94.99                           | 94.99                           | 94.99                           | 95.07                           | 99.97                           | 99.97                           | 99.91                           | 100                             | 99.97                           |
| <b>Ae717<br/>_Ps2_r<br/>poB</b>  | 95.01                            | 95.01                           | 95.01                           | 95.01                           | 95.1                            | 100                             | 100                             | 99.94                           | 99.97                           | 100                             |

A

### Cluster S: Ae707\_Ps1 BGC 10

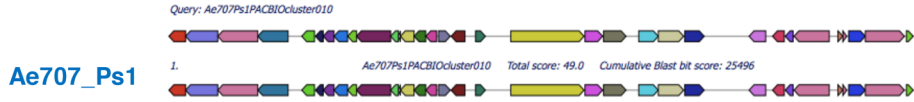

B

### Cluster T: Ae717\_Ps2 Iterative T1PKS

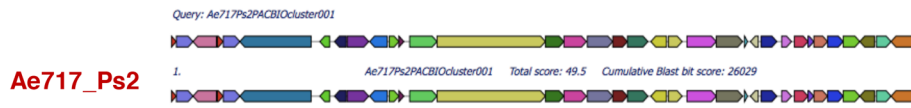

C

### Cluster U: Ps2 T1PKS

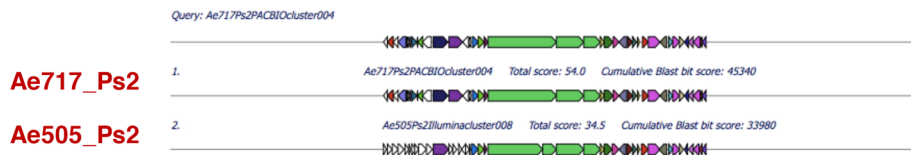

D

### Cluster V: Ae717\_Ps2 T2PKS

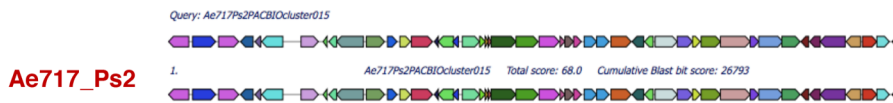

E

### Cluster W: Ps1 Lantipeptide

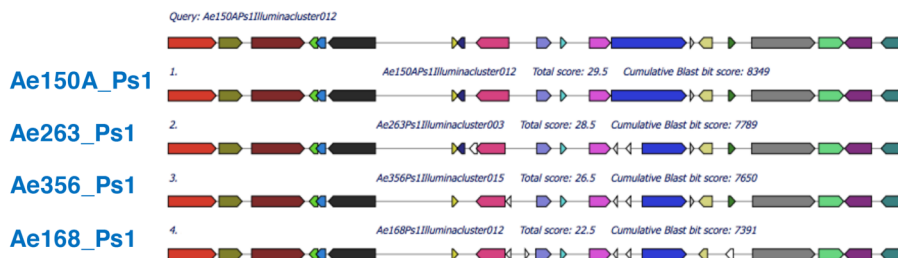



**Supplementary Figure 11. Multigene blast outputs of other biosynthetic gene clusters that are not shared amongst or between Ps phylotypes.** Unique clusters include; cluster S: Ae707\_Ps1 encodes a unique cluster forming an unknown product (A), cluster T: Ae717\_Ps2 encodes an iterative PKS cluster not found in other Ps strains (B), cluster U: Ae717\_Ps2 and Ae505\_Ps2 are the only strains to have an additional T1PKS cluster (C), cluster V: Ae717\_Ps2 encodes a T2PKS cluster not found in other Ps strains (D), cluster W: a subset of Ps1 strains encode a cluster for production of a lantipeptide (E).

**Supplementary Table 5: tBlastn of *Pseudonocardia autotrophica* polyene NPP BGC amino acid sequences against putative nystatin clusters of Ae707\_Ps1 (PacBio) and Ae717\_Ps2 (PacBio).** NppC against Ae707\_Ps1 nystatin cluster has two results as the blast algorithm separated the sequences into two. All PKS type I proteins against Ae706\_Ps2 were given the 3 top hits, as the conservation is low it is difficult to assign identity of the PKS proteins to the respective homologues present in the *P. autotrophica* cluster.

| NPP BGC  | Amino Acid Length | Protein Function                | Ae707_Ps 1 Cluster % Identity | Ae707_Ps 1 Query % Coverage | Ae717_Ps 2 Cluster % Identity | Ae717_Ps 2 Query % Coverage |
|----------|-------------------|---------------------------------|-------------------------------|-----------------------------|-------------------------------|-----------------------------|
| NppY     | 475               | Glycosyltransferase             | 83                            | 98                          | 43                            | 94                          |
| NppF     | 224               | Phosphopantetheinyl transferase | 90                            | 99                          | 70                            | 0.045                       |
| NppG     | 592               | ABC transporter                 | 90                            | 99                          | 56                            | 86                          |
| NppH     | 584               | ABC transporter                 | 89                            | 100                         | 52                            | 97                          |
| NppDII I | 344               | GDP-mannose-4,6-dehydratase     | 97                            | 100                         | 79                            | 100                         |
| NppI     | 9499              | Type I PKS                      | 90                            | 100                         | 59<br>49<br>62                | 26<br>32<br>15              |
| NppJ     | 5425              | Type I PKS                      | 86                            | 100                         | 57<br>59<br>53                | 35<br>23<br>34              |
| NppK     | 2031              | Type I PKS                      | 89                            | 100                         | 60<br>59<br>60                | 55<br>49<br>50              |
| NppL     | 403               | P450 mono oxygenase             | 85                            | 97                          | 47                            | 90                          |
| NppN     | 413               | P450 mono oxygenase             | 84                            | 100                         | 69                            | 90                          |
| NppDII   | 352               | Aminotransferase                | 96                            | 100                         | 74                            | 99                          |
| NppDI    | 489               | Glycosyltransferase             | 93                            | 97                          | 60                            | 96                          |
| NppA     | 1097              | Type I PKS                      | 89                            | 100                         | 59<br>57<br>60                | 79<br>79<br>78              |
| NppB     | 3175              | Type I PKS                      | 90                            | 100                         | 54<br>48                      | 78<br>47                    |

|             |       |               |    |     |    |    |
|-------------|-------|---------------|----|-----|----|----|
|             |       |               |    |     | 48 | 46 |
| NppC        | 10876 | Type I PKS    | 87 | 56  | 54 | 43 |
|             |       |               | 89 | 43  | 52 | 37 |
|             |       |               |    |     | 53 | 32 |
| NppE        | 274   | Thioesterase  | 91 | 100 | 53 | 82 |
| NppRI       | 946   | Regulation    | 86 | 100 | 47 | 97 |
| NppRII      | 765   | Regulation    | 79 | 100 | 45 | 93 |
| NppRII<br>I | 925   | Regulation    | 77 | 97  | 43 | 62 |
| NppO        | 526   | Decarboxylase | 97 | 100 | 87 | 98 |
| NppRI<br>V  | 213   | Regulation    | 94 | 100 | 68 | 91 |
| NppM        | 138   | Ferredoxin    | 74 | 90  | 55 | 69 |
| NppRV       | 963   | Regulation    | 69 | 97  | 40 | 95 |
| NppRV<br>I  | 684   | Regulation    | 70 | 97  | 38 | 97 |

**Supplementary Table 6. Blastx of the PKS amino acid sequences from either the Ae707\_Ps1 PacBio nystatin cluster against Ps1 strains nucleotide sequence or the PKS amino acid sequences from the Ae717\_Ps2 PacBio nystatin cluster against Ps2 strains nucleotide sequence. (\*) The PKS modules in PKS amino acid sequences for 3119 do not cover the full amino acid length in any of the other Ps1 strains and this corresponds to an amino acid sequence that encodes two modules.**

| Amino Acid                       | Length (aa) | Ae150A_Ps1 Illumina Identity                          | Ae150A_Ps1 Illumina Locus                       | Ae168_Ps1 Illumina Identity                           | Ae168_Ps1 Illumina Locus                        | Ae263_Ps1 Illumina Identity                           | Ae263_Ps1 Illumina Locus                              | Ae356_Ps1 Illumina Identity                           | Ae356_Ps1 Illumina Locus                              | Ae707_Ps1 PacBio Identity | Ae707_Ps1 PacBio Locus      |
|----------------------------------|-------------|-------------------------------------------------------|-------------------------------------------------|-------------------------------------------------------|-------------------------------------------------|-------------------------------------------------------|-------------------------------------------------------|-------------------------------------------------------|-------------------------------------------------------|---------------------------|-----------------------------|
| Ae707_Ps1_3121<br>NypA/NppA      | 1106        | 565/603 (94%)<br>391/431 (91%)                        | 43301-45049<br>42105-43289                      | 565/603 (94%)<br>391/431 (91%)                        | 47494-49242<br>46298-47482                      | 565/603 (94%)<br>391/431 (91%)                        | 5432888-5431140<br>5434084-5432900                    | 565/603 (94%)<br>391/431 (91%)                        | 1678228-1679976<br>1677032-1678216                    | 1106/1106 (100%)          | 3411435-3408118             |
| Ae707_Ps1_3120<br>NypB/NppB      | 3188        | 1530/1555 (98%)<br>832/843 (99%)<br>750/767 (98%)     | 50138-54793<br>45302-47830<br>47842-50133       | 1530/1555 (98%)<br>832/843 (99%)<br>750/767 (98%)     | 54331-58986<br>49495-52023<br>52035-54326       | 1530/1555 (98%)<br>832/843 (99%)<br>750/767 (98%)     | 5426051-5421396<br>5430887-5428359<br>5428347-5426056 | 1530/1555 (98%)<br>832/843 (99%)<br>750/767 (98%)     | 1685065-1689720<br>1680409-1682757<br>1682769-1685060 | 3188/3188 (100%)          | 3408069-3398506             |
| Ae707_Ps1_3119<br>NypC/NppC<br>* | 10899       | 3683/4065 (91%)<br>1826/1857 (98%)<br>1118/1139 (98%) | 6846-76113<br>54817-60387<br>60389-63805        | 3685/4065 (91%)<br>1826/1857 (98%)<br>1118/1139 (98%) | 68136-80306<br>59010-64580<br>64582-67998       | 3685/4065 (91%)<br>1825/1857 (98%)<br>1118/1139 (98%) | 5412246-5400076<br>5421192-5415802<br>5415800-5412384 | 3685/4065 (91%)<br>1826/1857 (98%)<br>1118/1139 (98%) | 1698870-1711040<br>1689744-1695314<br>1695316-1698732 | 10895/10895 (100%)        | 3398482-3365798             |
| Ae707_Ps1_3128<br>NypI/NppI      | 9524        | 6924/7034 (98%)<br>1448/1470 (99%)<br>994/1007 (99%)  | 760991-739890<br>739869-735466<br>764056-761042 | 6924/7034 (98%)<br>1448/1470 (99%)<br>994/1007 (99%)  | 760457-739356<br>739335-734932<br>763522-760508 | 6925/7034 (98%)<br>1448/1470 (99%)<br>994/1007 (99%)  | 4718060-4739161<br>4739182-4743585<br>4714995-4718009 | 6925/7034 (98%)<br>1448/1470 (99%)<br>994/1007 (99%)  | 2393068-2371967<br>2371946-2367543<br>2396133-2393119 | 9524/9524 (100%)          | 3468317-3439746             |
| Ae707_Ps1_3127<br>NypJ/NppJ      | 5420        | 3079/3163 (97%)<br>2178/2248 (97%)                    | 735442-726068<br>726011-719274                  | 3079/3163 (97%)<br>2178/2248 (97%)                    | 734908-725534<br>725477-718740                  | 3079/3163 (97%)<br>2178/2248 (97%)                    | 4743609-4752983<br>4753040-4759777                    | 3079/3163 (97%)<br>2178/2248 (97%)                    | 2367519-2358145<br>2358088-2351351                    | 5420/5420 (100%)          | 3439722-3423463             |
| Ae707_Ps1_3126<br>NypK/NppK      | 2027        | 969/981 (99%)<br>1003/1007 (99%)                      | 719233-716291<br>716166-713146                  | 969/981 (99%)<br>1002/1007 (99%)                      | 718699-715757<br>715632-712612                  | 969/981 (99%)<br>1001/1006 (99%)                      | 4759818-4762760<br>4762889-4765906                    | 969/981 (99%)<br>1001/1006 (99%)                      | 2351310-2348368<br>2348239-2345222                    | 2025/2025 (100%)          | 3423422-3417348             |
| Amino Acid                       | Length (aa) | Ae331_Ps2 Illumina Identity                           | Ae331_Ps2 Illumina Locus                        | Ae406_Ps2 Illumina Identity                           | Ae406_Ps2 Illumina Locus                        | Ae505_Ps2 Illumina Identity                           | Ae505_Ps2 Illumina Similarity                         | Ae706_Ps2 Illumina Identity                           | Ae706_Ps2 Illumina Similarity                         | Ae717_Ps2 PacBio Identity | Ae717_Ps2 PacBio Similarity |
| Ae717_Ps2_3010<br>PKS A          | 2554        | 2540/2540 (100%)                                      | 4471485-4479104                                 | 2540/2540 (100%)                                      | 1602520-1594901                                 | 2539/2540 (99%)                                       | 5280963-5273347                                       | 2540/2540 (100%)                                      | 1611426-1603807                                       | 2540/2540 (100%)          | 3308031-3300412             |
| Ae717_Ps2_3009<br>PKS B          | 6856        | 6838/6859 (99%)                                       | 4479198-4499774                                 | 6838/6865 (99%)                                       | 1594807-1574213                                 | 6192/6239 (99%)<br>613/632 (97%)                      | 5271344-5252703<br>5273253-5271358                    | 6838/6859 (99%)                                       | 1603713-1583137                                       | 6856/6856 (100%)          | 3300318-3279751             |
| Ae717_Ps2_3026<br>PKS C          | 3490        | 3344/3351 (99%)                                       | 4400747-4410799                                 | 3344/3351 (99%)                                       | 1668401-1658349                                 | -                                                     | -                                                     | 3344/3351 (99%)                                       | 1682164-1672112                                       | 3361/3361 (100%)          | 3377832-3367750             |
| Ae717_Ps2_3025<br>PKS D          | 5917        | 5878/5917 (99%)                                       | 4411202-4428913                                 | 5879/5917 (99%)                                       | 1657946-1640235                                 | -                                                     | -                                                     | 5879/5917 (99%)                                       | 1671709-1653998                                       | 5917/5917 (100%)          | 3367381-3349631             |
| Ae717_Ps2_3024<br>PKS E          | 3234        | 3074/3078 (99%)<br>155/155 (100%)                     | 4428930-4438163<br>4438177-4438641              | 3074/3078 (99%)<br>155/155 (100%)                     | 1640218-1630985<br>1630971-1630507              | -                                                     | -                                                     | 3074/3078 (99%)<br>155/155 (100%)                     | 1653981-1644748<br>1644734-1644270                    | 3234/3234 (100%)          | 3349614-3339913             |
| Ae717_Ps2_3023<br>PKS F          | 3747        | 3740/3747 (99%)                                       | 4438641-4449881                                 | 3740/3747 (99%)                                       | 1630507-1619267                                 | -                                                     | -                                                     | 3739/3747 (99%)                                       | 1644270-1633030                                       | 3747/3747 (100%)          | 3339913-3328673             |
| Ae717_Ps2_3022<br>PKS G          | 2048        | 2047/2048 (99%)                                       | 4449921-4456064                                 | 2047/2048 (99%)                                       | 1619227-1613084                                 | -                                                     | -                                                     | 2047/2048 (99%)                                       | 1632990-1626847                                       | 2048/2048 (100%)          | 3328633-3322490             |

## References

Larkin, M. A., Blackshields, G., Brown, N. P., Chenna, R., McGettigan, P. A., McWilliam, H., et al. (2007). Clustal W and Clustal X version 2.0. *Bioinformatics* 23, 2947–2948. doi:10.1093/bioinformatics/btm404.

Weber, T., Blin, K., Duddela, S., Krug, D., Kim, H. U., Bruccoleri, R., et al. (2015). antiSMASH 3.0—a comprehensive resource for the genome mining of biosynthetic gene clusters. *Nucleic Acids Res* 43, W237–43. doi:10.1093/nar/gkv437.
